# Supplementary material
Source: PubMed Central journal article supplement (PMC5097946)
Supplement: mmc1.pdf [file mmc1.pdf]

The American Journal of Human Genetics, Volume 99

## Supplemental Data

### ***RNF213* Is Associated with Intracranial Aneurysms in the French-Canadian Population**

**Sirui Zhou, Amirthagowri Ambalavanan, Daniel Rochefort, Pingxing Xie, Cynthia V. Bourassa, Pascale Hince, Alexandre Dionne-Laporte, Dan Spiegelman, Ziv Gan-Or, Cathy Mirarchi, Vessela Zaharieva, Nicolas Dupré, Hatasu Kobayashi, Toshiaki Hitomi, Kouji Harada, Akio Koizumi, Lan Xiong, Patrick A. Dion, and Guy A. Rouleau**

**Figure S1: PCA analysis of FC patients and controls**

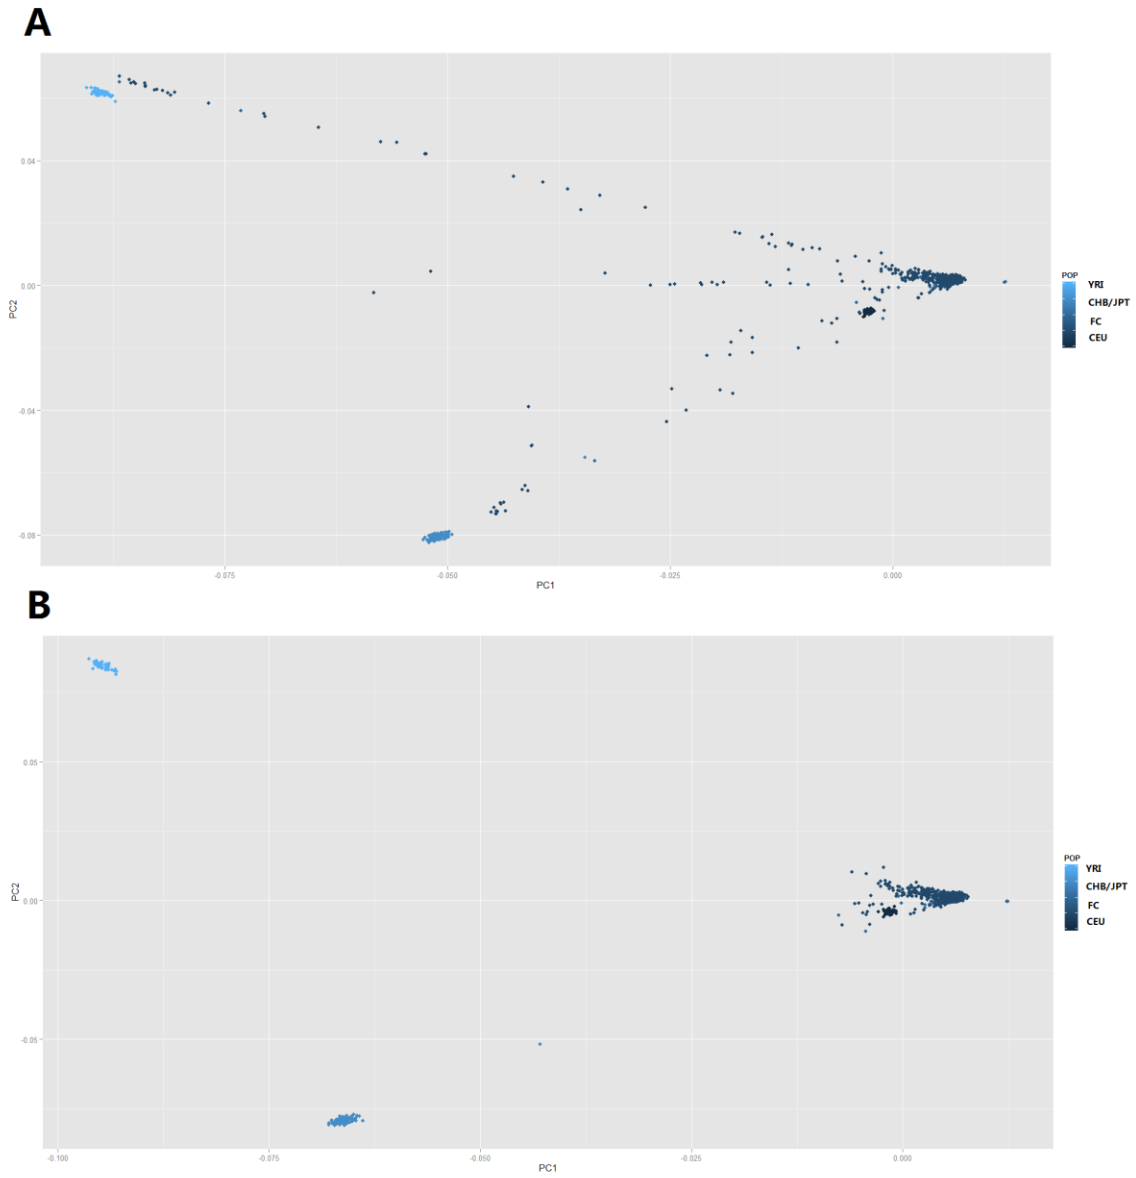

PCA analysis done using smartPCA and graph constructed by R. (A) PCA plot of the FC NeuroX cohort (B) Samples involved in this study after the removal of 95 admixed individuals. YRI, CHB/JPT and CEU

populations from 1KG phase III were used for clustering and outliers with less than 90% of European ancestry are removed.

Figure S2:  $F_{ST}$  of *RNF213* common variations between worldwide populations

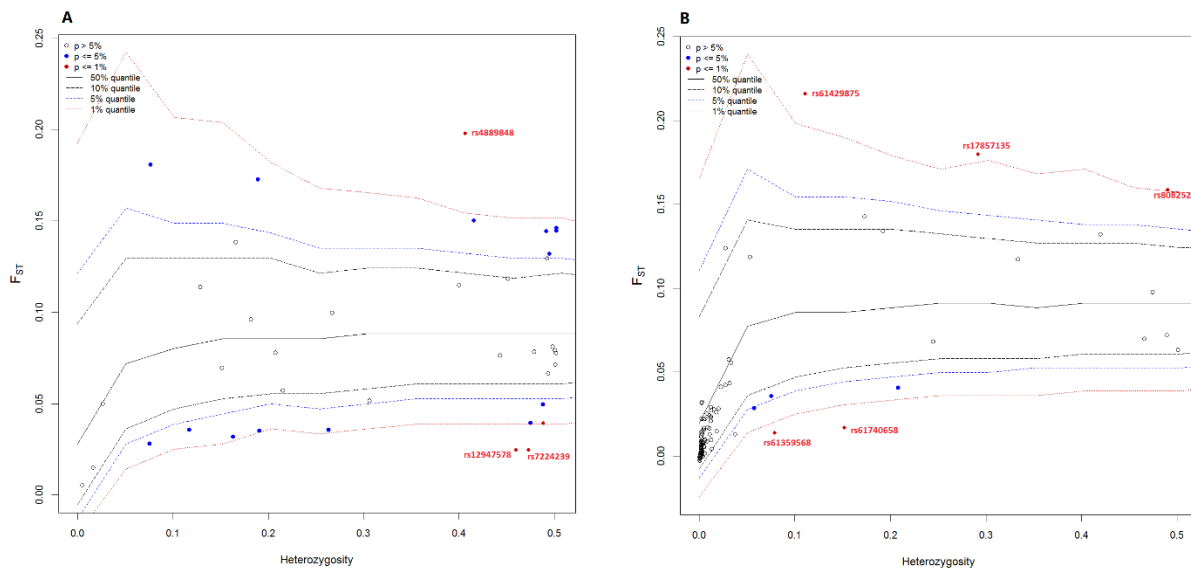

$F_{ST}$  of *RNF213* common variants (A) and (B) functional variants, SNPs in red indicate they are outliers of 50% quantile.

Figure S3: MAF of rs6565666 distribution in world-wide populations

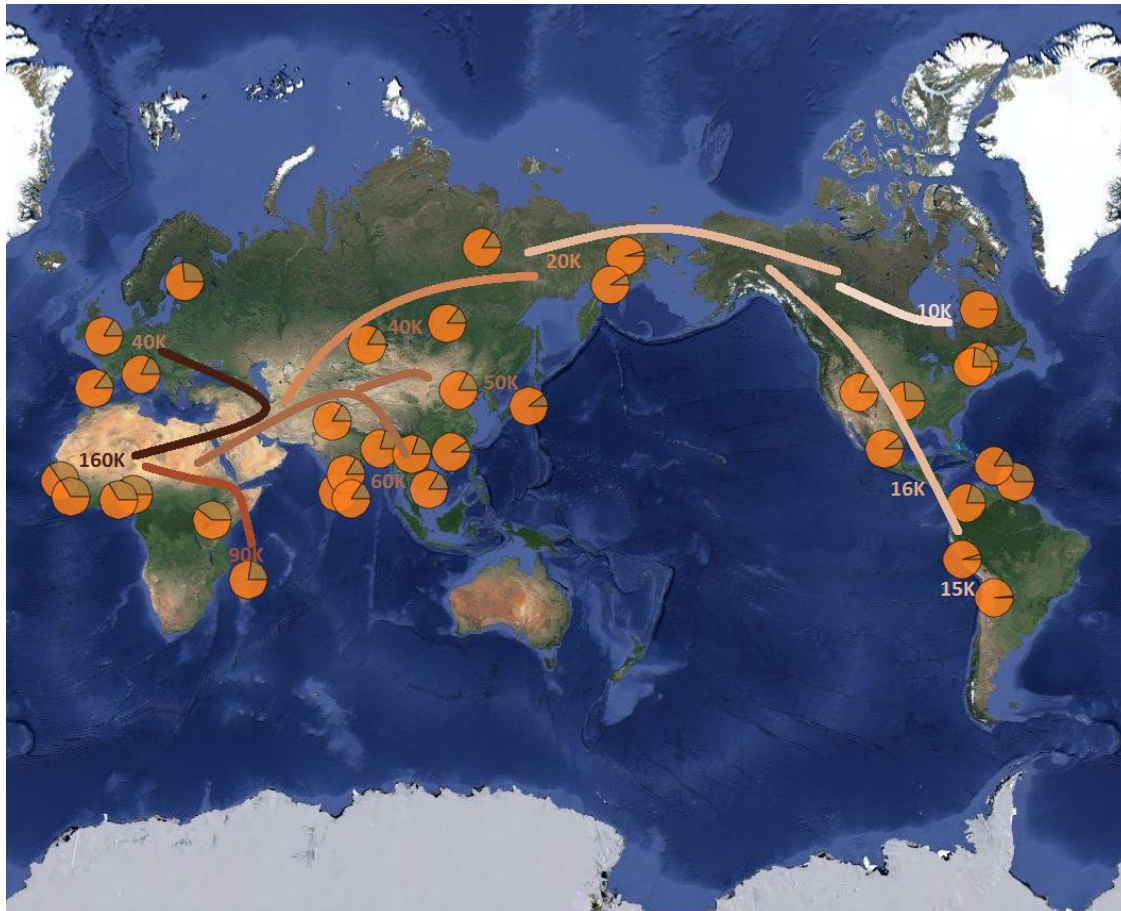

The frequency of rs6565666 non-ancestral allele decreased from Africans (0.26-0.35) to Europeans (0.16-0.18) and Asians (0.17-0.1) to the lowest in arctic populations (0.04-0.003). This non-ancestral allele seem also to be the risk allele for IA (dominant model for minor allele,  $p=0.0001739$ ), which seems to correlate with the Out-of-Africa migration patterns and risk allele being purged in the evolution.

**Table S1. Clinical descriptions of the IA discovery cohort and replication cohort.**

|                                                | Number of individuals in discovery cohort | Number of individuals in replication cohort (familial) | Number of individuals in replication cohort (sporadic) |
|------------------------------------------------|-------------------------------------------|--------------------------------------------------------|--------------------------------------------------------|
| With clinical file                             | 26                                        | 147                                                    | 65                                                     |
| Multiple aneurysms                             | 12                                        | 55                                                     | 19                                                     |
| SAH                                            | 5                                         | 51                                                     | 25                                                     |
| Hypertension                                   | 4                                         | 60                                                     | 31                                                     |
| Drinking                                       | 12                                        | 33                                                     | 26                                                     |
| Smoking                                        | 24                                        | 89                                                     | 50                                                     |
| Hypercholesterolemia                           | 3                                         | 29                                                     | 24                                                     |
| Hypothyroidism                                 | 0                                         | 17                                                     | 14                                                     |
| Had heart diseases and other vascular diseases | 0                                         | 13                                                     | 3                                                      |

**Table S3: Population data retrieved for this study**

| Region         | Populations    | No. Samples | Data access       | Data source  | SNPs in RNF213 |
|----------------|----------------|-------------|-------------------|--------------|----------------|
| Argentina      | Argentina      | 50          | GEO               | Omni         | 40             |
| Siberia        | Chukotka       | 48          | GEO               | Omni         | 48             |
| Siberia        | East-Siberia   | 85          | GEO               | Omni         | 48             |
| Kamchatka Krai | Kamchatka Krai | 67          | GEO               | Omni         | 48             |
| Sakha Republic | Sakha Republic | 46          | GEO               | Omni         | 48             |
| West-Siberia   | West-Siberia   | 103         | GEO               | Omni         | 48             |
| Africa         | Madagascar     | 69          | GEO               | Omni         | 39             |
| East_Asia      | Han Chinese    | 203         | 1000 Genome       | Omni & Exome | 1835           |
| East_Asia      | JPT            | 104         | 1000 Genome       | Omni & Exome | 1835           |
| East_Asia      | CDX            | 93          | 1000 Genome       | Omni & Exome | 1835           |
| East_Asia      | Vietnamese     | 117         | 1000 Genome & GEO | Omni & Exome | 1835           |
| Europe         | CEU            | 99          | 1000 Genome       | Omni & Exome | 1835           |

|                |       |     |                |              |      |
|----------------|-------|-----|----------------|--------------|------|
| Europe         | TSI   | 107 | 1000 Genome    | Omni & Exome | 1835 |
| Europe         | GBR   | 91  | 1000 Genome    | Omni & Exome | 1835 |
| Europe         | FIN   | 99  | 1000 Genome    | Omni & Exome | 1835 |
| Europe         | IBS   | 107 | 1000 Genome    | Omni & Exome | 1835 |
| Africa         | YRI   | 108 | 1000 Genome    | Omni & Exome | 1835 |
| Africa         | LWK   | 99  | 1000 Genome    | Omni & Exome | 1835 |
| Africa         | GWD   | 113 | 1000 Genome    | Omni & Exome | 1835 |
| Africa         | MSL   | 85  | 1000 Genome    | Omni & Exome | 1835 |
| Africa         | ESN   | 99  | 1000 Genome    | Omni & Exome | 1835 |
| Native-America | ASW   | 61  | 1000 Genome    | Omni & Exome | 1835 |
| Native-America | ACB   | 96  | 1000 Genome    | Omni & Exome | 1835 |
| Native-America | MXL   | 64  | 1000 Genome    | Omni & Exome | 1835 |
| Native-America | PUR   | 104 | 1000 Genome    | Omni & Exome | 1835 |
| Native-America | CLM   | 94  | 1000 Genome    | Omni & Exome | 1835 |
| Native-America | PEL   | 85  | 1000 Genome    | Omni & Exome | 1835 |
| South_Asia     | GIH   | 103 | 1000 Genome    | Omni & Exome | 1835 |
| South_Asia     | PJL   | 96  | 1000 Genome    | Omni & Exome | 1835 |
| South_Asia     | BEB   | 86  | 1000 Genome    | Omni & Exome | 1835 |
| South_Asia     | STU   | 102 | 1000 Genome    | Omni & Exome | 1835 |
| South_Asia     | ITU   | 102 | 1000 Genome    | Omni & Exome | 1835 |
| Inuit          | Inuit | 185 | In house & GEO | Omni         | 39   |

**Table S4: Exome sequencing coverage of 26 IA patients from the initial cohort**

| Indiv | Raw reads | % Coverage (10X) | 20X  | 30X  | 50X  | 75X  | 100X | Average base depth |
|-------|-----------|------------------|------|------|------|------|------|--------------------|
| 09-1  | 7.90E+07  | 97.1             | 90.7 | 81.2 | 59.8 | 35.5 | 18.5 | 66.07              |
| 09-2  | 8.80E+07  | 97.8             | 93.6 | 86.5 | 68.4 | 46.1 | 28.1 | 78.44              |
| 28-1  | 1.40E+08  | 98.4             | 97   | 94.7 | 87.5 | 75.8 | 63.4 | 144.4              |

|      |          |      |      |      |      |      |      |        |
|------|----------|------|------|------|------|------|------|--------|
| 28-2 | 1.40E+08 | 98.7 | 97.1 | 94.3 | 85.8 | 72.8 | 59.5 | 133.63 |
| 28-3 | 1.04E+08 | 98.2 | 95.6 | 90.9 | 77.7 | 59.5 | 42.6 | 99.55  |
| 28-4 | 9.10E+07 | 98.2 | 95   | 89.5 | 75   | 55.8 | 38.7 | 93.58  |
| 94-1 | 1.10E+08 | 98.5 | 96.7 | 93.3 | 82.4 | 65.7 | 49.7 | 111.25 |
| 94-2 | 1.10E+08 | 98.3 | 95.7 | 91.2 | 79.6 | 63.3 | 47.4 | 108.05 |
| 94-3 | 1.30E+08 | 98.8 | 97.3 | 94.9 | 87   | 74.3 | 61   | 137.29 |
| 94-4 | 1.10E+08 | 98.5 | 96.7 | 93.4 | 82.5 | 65.9 | 50   | 112.03 |
| 60-1 | 2.60E+09 | 90.9 | 85.5 | 79.3 | 62.6 | 40.9 | 25.8 | 78.36  |
| 60-2 | 3.10E+09 | 91.9 | 87.4 | 82.6 | 69.2 | 49.6 | 33.7 | 92.27  |
| 60-3 | 2.70E+09 | 91.5 | 86.6 | 80.9 | 64.9 | 43.2 | 27.7 | 81.79  |
| 60-4 | 3.40E+09 | 91.8 | 87.6 | 83.3 | 72.6 | 55.5 | 39.6 | 102.47 |
| 60-5 | 2.70E+09 | 90.6 | 85.3 | 79.2 | 63.4 | 42.5 | 27.4 | 80.68  |
| 10-1 | 3.10E+09 | 91.5 | 86.8 | 81.9 | 68.9 | 49.4 | 33.4 | 91.2   |
| 10-2 | 3.20E+09 | 91.7 | 87.2 | 82.7 | 70.9 | 52.8 | 36.7 | 97     |
| 10-3 | 3.80E+09 | 92.8 | 89.1 | 85.3 | 75.5 | 59.7 | 44.5 | 113.59 |
| 10-4 | 3.60E+09 | 92.5 | 87   | 81.2 | 69.4 | 54.7 | 41.3 | 108.23 |
| 10-5 | 3.10E+10 | 91.4 | 86.9 | 82   | 68.8 | 49.1 | 33.2 | 91.07  |
| 89-1 | 6.00E+09 | 93.6 | 90.6 | 88   | 83.2 | 75.9 | 67.1 | 177.72 |
| 89-2 | 1.20E+09 | 82.6 | 65.5 | 47   | 22.3 | 9.5  | 4.5  | 35.36  |
| 89-3 | 2.60E+09 | 90.2 | 84.2 | 77.7 | 61   | 39.7 | 25.1 | 76.43  |
| 89-4 | 2.60E+09 | 90.2 | 84.4 | 78   | 61.9 | 41.1 | 26.2 | 78.39  |
| 89-5 | 3.40E+09 | 91.5 | 87.1 | 82.7 | 71.7 | 55   | 39.6 | 102.88 |
| 89-6 | 4.20E+09 | 93   | 89.3 | 86.1 | 78.6 | 66   | 51.7 | 126.19 |

**Table S6. Cochran-Armitage trend test on 38 polymorphic SNPs in *RNF213* loci**

| CHR | SNP | A1 | A2 | TEST | AFF | UNAFF | CHISQ | DF | P |
|-----|-----|----|----|------|-----|-------|-------|----|---|
|-----|-----|----|----|------|-----|-------|-------|----|---|

|    |                       |   |   |       |         |           |          |   |          |
|----|-----------------------|---|---|-------|---------|-----------|----------|---|----------|
| 17 | rs7217421             | A | G | TREND | 248/256 | 1722/1996 | 1.478    | 1 | 0.2241   |
| 17 | rs4889968             | G | A | TREND | 12/484  | 117/3513  | 0.8884   | 1 | 0.3459   |
| 17 | rs9916351             | C | T | TREND | 221/287 | 1757/1969 | 2.436    | 1 | 0.1186   |
| 17 | rs12947578            | A | G | TREND | 202/306 | 1583/2139 | 1.444    | 1 | 0.2295   |
| 17 | rs9913317             | A | G | TREND | 0/502   | 1/3733    | 0.1345   | 1 | 0.7138   |
| 17 | rs7219131             | C | T | TREND | 224/280 | 1780/1940 | 2.13     | 1 | 0.1444   |
| 17 | rs12601730            | G | T | TREND | 12/496  | 113/3615  | 0.6745   | 1 | 0.4115   |
| 17 | rs7220465             | T | C | TREND | 128/374 | 1092/2636 | 3.117    | 1 | 0.0775   |
| 17 | rs11869363            | C | T | TREND | 136/370 | 1173/2545 | 4.732    | 1 | 0.0296   |
| 17 | rs12937242            | T | C | TREND | 77/431  | 687/3037  | 3.324    | 1 | 0.06827  |
| 17 | rs8068939             | T | G | TREND | 125/383 | 1004/2728 | 1.193    | 1 | 0.2747   |
| 17 | rs12451223            | C | T | TREND | 120/388 | 935/2795  | 0.501    | 1 | 0.4791   |
| 17 | rs8081176             | C | T | TREND | 159/349 | 1265/2467 | 1.327    | 1 | 0.2494   |
| 17 | rs6565666             | A | G | TREND | 119/389 | 649/3085  | 11.29    | 1 | 0.00078  |
| 17 | rs7225029             | A | G | TREND | 45/461  | 280/3450  | 1.255    | 1 | 0.2626   |
| 17 | rs4889843             | G | A | TREND | 246/262 | 1681/2045 | 1.996    | 1 | 0.1577   |
| 17 | rs9907978             | A | G | TREND | 146/362 | 1243/2487 | 4.172    | 1 | 0.0411   |
| 17 | rs9908583             | G | A | TREND | 143/359 | 1232/2456 | 4.754    | 1 | 0.02923  |
| 17 | rs4890008             | T | G | TREND | 27/481  | 151/3577  | 1.791    | 1 | 0.1807   |
| 17 | rs10782008            | G | A | TREND | 173/335 | 1393/2331 | 2.139    | 1 | 0.1436   |
| 17 | rs8072917             | C | T | TREND | 173/335 | 1393/2331 | 2.148    | 1 | 0.1428   |
| 17 | rs4890009             | G | A | TREND | 144/358 | 1242/2484 | 4.266    | 1 | 0.03889  |
| 17 | rs4890010             | C | T | TREND | 173/335 | 1393/2327 | 2.209    | 1 | 0.1372   |
| 17 | NeuroX_chr17:78319717 | T | C | TREND | 0/508   | 2/3732    | 0.2724   | 1 | 0.6018   |
| 17 | rs11150856            | C | T | TREND | 68/440  | 544/3188  | 0.4948   | 1 | 0.4818   |
| 17 | rs12051723            | T | G | TREND | 98/410  | 545/3183  | 7.603    | 1 | 0.005829 |
| 17 | rs11655038            | T | G | TREND | 40/468  | 337/3391  | 0.7355   | 1 | 0.3911   |
| 17 | rs7216493             | G | A | TREND | 128/380 | 1086/2642 | 3.345    | 1 | 0.0674   |
| 17 | rs8078251             | G | A | TREND | 170/338 | 1230/2490 | 0.03161  | 1 | 0.8589   |
| 17 | rs4078429             | G | A | TREND | 28/478  | 198/3532  | 0.04479  | 1 | 0.8324   |
| 17 | rs6565681             | A | G | TREND | 76/430  | 610/3114  | 0.5957   | 1 | 0.4402   |
| 17 | rs4889848             | C | T | TREND | 75/433  | 608/3124  | 0.7565   | 1 | 0.3844   |
| 17 | rs7224239             | G | A | TREND | 249/259 | 1622/2112 | 5.759    | 1 | 0.01641  |
| 17 | rs12944385            | G | A | TREND | 3/505   | 22/3712   | 1.44E-05 | 1 | 0.997    |
| 17 | rs4890018             | C | T | TREND | 31/477  | 210/3516  | 0.1718   | 1 | 0.6785   |
| 17 | rs8072774             | T | C | TREND | 40/466  | 324/3406  | 0.3454   | 1 | 0.5567   |
| 17 | rs3185057             | A | G | TREND | 51/457  | 312/3418  | 1.541    | 1 | 0.2144   |
| 17 | rs8359                | T | C | TREND | 42/466  | 332/3400  | 0.2201   | 1 | 0.6389   |
