# Supplementary material
Source: PubMed Central journal article supplement (PMC5097946)
Supplement: mmc4.pdf [file mmc4.pdf]

# *RNF213* Is Associated with Intracranial Aneurysms in the French-Canadian Population

Sirui Zhou,<sup>1,2</sup> Amirthagowri Ambalavanan,<sup>1,3</sup> Daniel Rochefort,<sup>1</sup> Pingxing Xie,<sup>1,4</sup> Cynthia V. Bourassa,<sup>1</sup> Pascale Hince,<sup>1</sup> Alexandre Dionne-Laporte,<sup>1</sup> Dan Spiegelman,<sup>1</sup> Ziv Gan-Or,<sup>1,3,5</sup> Cathy Mirarchi,<sup>1</sup> Vessela Zaharieva,<sup>1</sup> Nicolas Dupré,<sup>6,7</sup> Hatasu Kobayashi,<sup>8</sup> Toshiaki Hitomi,<sup>8</sup> Kouji Harada,<sup>8</sup> Akio Koizumi,<sup>8</sup> Lan Xiong,<sup>2,9</sup> Patrick A. Dion,<sup>1,5</sup> and Guy A. Rouleau<sup>1,5,\*</sup>

Intracranial aneurysms (IAs) are the result of focal weakness in the artery wall and have a complex genetic makeup. To date, genome-wide association and sequencing studies have had limited success in identifying IA risk factors. Distinct populations, such as the French-Canadian (FC) population, have increased IA prevalence. In our study, we used exome sequencing to prioritize risk variants in a discovery cohort of six FC families affected by IA, and the analysis revealed an increased variation burden for ring finger protein 213 (*RNF213*). We resequenced *RNF213* in a larger FC validation cohort, and association tests on further identified variants supported our findings (SKAT-O,  $p = 0.006$ ). *RNF213* belongs to the AAA+ protein family, and two variants (p.Arg2438Cys and p.Ala2826Thr) unique to affected FC individuals were found to have increased ATPase activity, which could lead to increased risk of IA by elevating angiogenic activities. Common SNPs in *RNF213* were also extracted from the NeuroX SNP-chip genotype data, comprising 257 FC IA-affected and 1,988 control individuals. We discovered that the non-ancestral allele of rs6565666 was significantly associated with the affected individuals ( $p = 0.03$ ), and it appeared as though the frequency of the risk allele had changed through genetic drift. Although *RNF213* is a risk factor for moyamoya disease in East Asians, we demonstrated that it might also be a risk factor for IA in the FC population. It therefore appears that the function of *RNF213* can be differently altered to predispose distinct populations to dissimilar neurovascular conditions, highlighting the importance of a population's background in genetic studies of heterogeneous disease.

## Introduction

Intracranial aneurysms (IAs [MIM: 105800]) are vascular abnormalities characterized by dilations or ballooning of intracranial arteries. Their pathology is not clear, but lesions are usually characterized by very thin (or absent) tunica media and internal elastic lamina within the arterial walls at IA sites.<sup>1</sup> The worldwide prevalence of IAs is 1%–3%.<sup>2,3</sup> Moreover, this condition entails severe consequences, particularly when subarachnoid hemorrhages (SAHs) occur (incidence rate = 0.5%–1%<sup>4</sup>) because 30%–45% of SAHs are fatal within 30 days.<sup>5</sup> The annual incidence of SAHs is 4–9 per 100,000 worldwide, and 80% of all spontaneous SAHs are caused by rupture of the aneurysm.<sup>6</sup> The formation and rupture of IAs are related to complex risk factors, including smoking and alcohol consumption, hypertension,<sup>7</sup> and other vascular diseases,<sup>8</sup> a very small percentage of which are related to infections<sup>9</sup> and trauma.<sup>10</sup> Many studies have provided evidence suggesting that a large fraction of IA and SAH cases involve underlying genetic risk factors. First-degree relatives of individuals with aneurysmal SAHs have a 4- to 7-fold higher risk of being affected than the general population.<sup>11</sup>

Several genome-wide association studies (GWAS) have examined sporadic IAs, and these have identified several candidate loci (e.g., 2q33.1, 8q11.23, and 9p23.1;<sup>12,13</sup> 18q11.2, 13q13.1, and 10q24.32;<sup>14</sup> 7p21.1;<sup>15</sup> regions near rs1930095, rs7781293, rs7550260, and rs9864101;<sup>16</sup> and 4q31.22<sup>17</sup>). Unfortunately, follow-up replication studies suggest that these loci are unlikely to explain a large fraction of IAs. It has been reported that the French-Canadian (FC) population has higher IA and SAH incidence rates, and affected individuals usually aggregate in families, especially large pedigrees.<sup>18</sup> In a study conducted in the Saguenay-Lac-Saint-Jean region of Québec, it was observed that 30% of IA-affected individuals had a family history.<sup>19</sup> It is believed that IAs are genetically heterogeneous, and therefore population-specific variants might play a big part in their pathogenesis, especially in familial aggregates. In order to explore those hypotheses, we conducted whole-exome sequencing (WES) and target sequencing experiments in a group of familial IA subjects of FC descent. We focused our attention on the identification of rare, or FC-specific, variations as genetic factors that might explain the high prevalence and familial aggregation of IAs in this population.

<sup>1</sup>Montreal Neurological Institute and Hospital, McGill University, Montréal, QC H3A 2B4, Canada; <sup>2</sup>Department of Medicine, Faculty of Medicine, Université de Montréal, Montréal, QC H3T 1J4, Canada; <sup>3</sup>Department of Human Genetics, McGill University, Montréal, QC H3A 0G4, Canada; <sup>4</sup>Faculty of Medicine, McGill University, Montréal, QC H3A 0G4, Canada; <sup>5</sup>Department of Neurology and Neurosurgery, McGill University, Montréal, QC H3A 0G4, Canada; <sup>6</sup>Department of Neurological Sciences, Centre Hospitalier Universitaire de Québec, Québec, QC G1V 0A6, Canada; <sup>7</sup>Department of Medicine, Faculty of Medicine, Laval University, Québec, QC G1V 0A6, Canada; <sup>8</sup>Department of Health and Environmental Sciences, Graduate School of Medicine, Kyoto University, Yoshida Konocho, Kyoto 606-8501, Japan; <sup>9</sup>Centre de Recherche, Institut Universitaire en Santé Mentale de Montréal, Montréal QC H1N 3M5, Canada

\*Correspondence: [guy.rouleau@mcgill.ca](mailto:guy.rouleau@mcgill.ca)

<http://dx.doi.org/10.1016/j.ajhg.2016.09.001>

© 2016

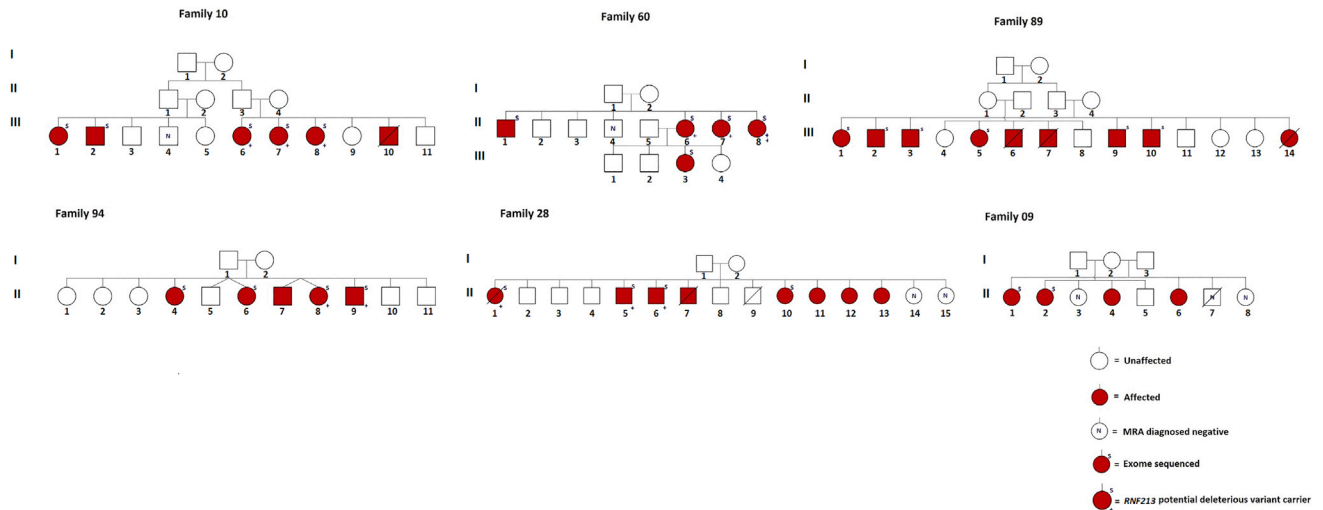

**Figure 1. Six Pedigrees with 26 IA-Affected Individuals from the Initial Cohort**

## Material and Methods

### Discovery Cohort

The discovery cohort of this study included 26 FC individuals (from six families) who had received a positive IA diagnosis (Figure 1); diagnostics were confirmed either by magnetic resonance angiography (1.5T) or by surgical confirmation (clipped or coiled). Subjects were excluded if they had received a personal diagnosis or had a history of polycystic kidney disease (MIM: 173900), Ehlers-Danlos syndrome type IV (MIM: 130050), neurofibromatosis type 1 (MIM: 162200), Marfan syndrome (MIM: 154700), or other intracranial vascular malformations, including moyamoya disease (MMD [MIM: 607151]).

Written consent was obtained for all the participants, and the study was approved by the Comité d'Éthique de la Recherche du Centre Hospitalier de l'Université de Montréal (Notre Dame Hospital 04.101, Québec).

### Control Population Cohort

Exome control populations for this study were selected from our in-house exome database, which includes 189 healthy FC individuals. Additionally, SNP-chip genotype data for 1,988 unrelated FC control individuals with no obvious cerebrovascular disease were also included in this study.

### WES and Variant Prioritization

Genomic DNA for each individual was extracted from peripheral-blood lymphocytes with the Gentra Puregene Blood Kit (QIAGEN). A 50  $\mu$ L DNA sample at a concentration of 100 ng/ $\mu$ L from each sample was captured by the Agilent SureSelect V4 Capture Kit. The library was subsequently paired-end sequenced with 100 bp reads on an Illumina HiSeq 2000; three samples per lane were used to ensure an average coverage depth of 100 $\times$ . All high-throughput and Sanger sequencing was performed at the McGill University and Génome Québec Innovation Centre.

Raw fastq files were aligned to the human reference sequence (NCBI Genome build GRCh37) with the Burrows-Wheeler Aligner (BWA),<sup>20</sup> and all PCR duplicates were removed from the alignments. The aligned reads were converted to binary format for further analysis with SAMtools.<sup>21</sup> Single-nucleotide variants and

indels were called with the UnifiedGenotyper from the Genome Analysis Toolkit (GATK)<sup>22</sup> v.2.7. Variant annotation was performed with ANNOVAR<sup>23</sup> with references to GRCh37, dbSNP version 132, the 1000 Genomes Project (1KGP, 2012 data release),<sup>24</sup> 69 Complete Genomics (2012 update), and the NHLBI Exome Sequencing Project Exome Variant Server (EVS), including ~6,500 exomes (2013 update). Finally, variant segregation analysis was performed with an in-house segregation program, and more than 1,000 exomes of different ethnicities from our lab were used as controls.

The sequencing quality was determined with GATK's DepthOfCoverage Walker. Quality control (QC) excluded variants with a sequencing depth < 10 or a genotype quality < 90 and variants present in a selection of frequently mutated genes, pseudo-genes, and genes in repetitive regions. After QC, preliminary analysis focused on variants that potentially affect protein function (missense and splice variants and small indels). Then, variants from all aforementioned databases were removed so the analysis could focus on FC-specific variants. PolyPhen-2<sup>25</sup> and GERP++<sup>26</sup> were used for predicting the deleterious level of the functional variants.

Subsequently, FC-specific, potentially deleterious variants shared by two or more affected individuals from each family were prioritized for further analysis, and genes harboring two or more of those variants were further selected as genes of interest.

Variants from these genes of interest in 106 FC control exomes were selected according to the same criteria, and a gene-based burden test using the variable-threshold (VT) method<sup>27</sup> implemented in Variant Association Tools (VAT)<sup>28</sup> was performed on these genes.

### Validation Cohort and Target Resequencing

After variant prioritization and selection of the most promising candidate gene, the whole coding regions of two isoforms of *RNF213* (ring finger protein 213 [MIM: 613768; GenBank: NM\_020954 and NM\_001256071]) were sequenced in a validation cohort of 223 IA-affected individuals and 88 IA-negative control individuals. 74 of the affected subjects had sporadic IAs, and the rest had a family history. The mean age of onset for familial IAs was 53.5  $\pm$  12 years, whereas that for sporadic IAs was 55.4  $\pm$  9 years. Of the individuals with detailed clinical information,

37.4% with a family history and 29% without a family history were indicated to have multiple aneurysms. On the other hand, 40.8% of subjects with familial IAs were indicated to have hypertension, whereas 47.7% of subjects with sporadic IAs were shown to have high blood pressure. Other environmental factors, such as drinking (22.4% familial versus 40% sporadic) and smoking (60.5% familial versus 76.9% sporadic), also seemed to play a larger part in sporadic IAs (Table S1). Targeted resequencing was performed with the Fluidigm Access Array System. 122 pairs of primers, each under 300 bp in length, were designed to cover a total of 58 exons of *RNF213* (Table S2). 50 ng of DNA for each sample was used for multiplex PCR, and products were paired-end sequenced on an Illumina MiSeq platform.

Bioinformatic analysis of the Fluidigm sequencing data was performed to first remove bad QC reads and adapter sequences. Subsequently, the reads were aligned to GRCh37 with the BWA v.0.7.5,<sup>29</sup> and alignments of each sample were combined. The GATK UnifiedGenotyper<sup>22</sup> was used for variant calling in the coding intervals of *RNF213*. The annotation and segregation steps were followed in a manner similar to that for WES. All variants were validated by the Integrative Genomics Viewer (IGV),<sup>30</sup> and rare (minor allele frequency [MAF]  $\leq$  0.01) missense variants were further validated by Sanger sequencing.

### Genotyping *RNF213* Common SNPs

SNP genotyping data from the NeuroX SNP-chip (Illumina Human OmniExpress bead chip as backbone), which contains 719,885 SNPs, was obtained for 257 IA-affected and 1,988 control individuals. Principle-component analysis (PCA) was performed with smartPCA software (implemented in EIGENSOFT)<sup>31</sup> to confirm the FC ethnicity of the samples used, and SNPs within the *RNF213* region were extracted from the genome-wide data. Additionally, *RNF213* common SNPs from 33 different populations were also obtained from our in-house database, the Gene Expression Omnibus (GEO),<sup>32–35</sup> and 1KGP phase 3 data<sup>24</sup> (Table S3).

### Statistical and Population Analysis

For further selection of the genes that are most likely to be risk candidates for IA, a gene-based burden test using the VT method<sup>27</sup> implemented in VAT<sup>28</sup> was performed for genes prioritized in the initial cohort.

The Sequence Kernel Association Test (SKAT)<sup>36</sup> was used to evaluate the effect of *RNF213* variants with weighted scores; this unified statistical test allows both rare and common variants to contribute to the overall statistic by calculating the logistic weights for each variant and applying them to the analysis according to the following formula:

$$\text{weights} = \frac{e^{(\text{par1}-\text{MAF})\text{par2}}}{1 + e^{(\text{par1}-\text{MAF})\text{par2}}}.$$

The SKAT optimal test (SKAT-O) was then used to evaluate the statistical significance of *RNF213* functional variants between affected and control individuals.

A Cochran-Armitage trend test was performed with Plink 1.9<sup>37</sup> to compare the allele distributions of all *RNF213* common SNPs in IA-affected and control individuals; an adjustment was made for multiple testing. Pairwise  $F_{ST}$  was calculated with Arlequin 3.5<sup>38</sup> between different populations to measure the population differentiation according to two different sets of their *RNF213* variations: (1) *RNF213* common SNPs from FC IA subjects, control individuals, and 33 other populations and (2) *RNF213* functional

variants from FC IA subjects, control individuals, and 25 populations from 1KGP phase 3 data. Variation burden of *RNF213* between FC and 1KGP phase 3 populations was also calculated by the VT method<sup>27</sup> implemented in VAT.<sup>28</sup>

### Expression-Vector Design

The *RNF213* full-length cDNA cloned into pcDNA3.1+ was obtained from a previous study.<sup>39</sup> Two AAA+ module fragments (amino acids 2,370–2,632 and 2,717–3,004) were individually amplified with Gibson-assembly-adapted primers; the first primer pair was 5'-GGT TCC GCG TGG ATC CCC GGA ATT Cgt gcc ctt caa tgt cga ctt tga taa ac-3' and 5'-GTC AGT CAC GAT GCG GCC GCT CGA Ggc gag tcc cgt ttt cat cta gg-3', and the second primer pair was 5'-GGT TCC GCG TGG ATC CCC GGA ATT Cag cag gct gct tct gga tg-3' and 5'-GTC AGT CAC GAT GCG GCC GCT CGA Gtc tat ttg aag cct ttg ctg cag caa aga cc-3'. The two AAA+ amplified fragments were assembled and cloned into the EcoRI and XhoI sites of the pGEX-4T1 vector (GE Healthcare) with the Gibson assembly method.<sup>40</sup> All clones were sequence validated.

### Mutagenesis

PCR site-directed mutagenesis was performed to introduce two variants, p.Arg2438Cys and p.Ala2826Thr, into the first and second AAA+ plasmids, respectively. Four additional previously described<sup>41</sup> variants (p.Lys2426Ala, p.Glu2488Ala, p.Lys2775Ala, and p. Glu2845Ala), which are known to cause loss of function (LOF) of the AAA+ ATPase, were also introduced as controls.

### Protein Purification

The wild-types, variants, and LOF controls of the two AAA+ fragments and empty pGEX-4T1 plasmid were transformed into BL21-CodonPlus cells, the protein was induced at 16°C overnight, and the N-terminal glutathione S-transferase (GST)-tagged protein was extracted with Glutathione Sepharose 4B beads (GE Healthcare) in PBS buffer containing PMSF protease inhibitor. PBS was carefully removed after protein extraction, and GST was eluted with buffer containing 50 mM Tris-HCl and 10 mM reduced glutathione. A Bradford protein assay was used for protein quantification.

### ATPase Assay

An ATPase assay was performed with BIOMOL Green (Enzo Life Sciences) for the detection of free phosphate. The GST-tagged wild-types, variants, and LOF controls were incubated in a 50  $\mu$ L buffer containing 300 mM KCl, 10 mM MgCl<sub>2</sub>, 50 mM HEPES-KOH (PH 7.5), and 5 mM ATP at 37°C for 20–40 min. The reaction was terminated by the addition of 100  $\mu$ L BIOMOL Green reagent and incubated at room temperature for 10 min. OD<sub>630nm</sub> was measured for the wild-types, variants, and LOF controls, and a standard curve was made with phosphate standard according to the manufacturer's protocol. ATPase activity ( $V_{\max}$ ) was measured by PO<sub>4</sub> quantity (nmol) per mg of protein per minute of reaction.

## Results

### Variant-Segregation Analysis and *RNF213* Recurrent Mutations

The average base depth of coverage of the 26 IA samples from the discovery cohort was 101 $\times$ , and 89.5% of the total target region was covered at 20 $\times$  (Table S4). After QC

**Table 1. Exome-Variant Filtration Steps and Results of Initial Cohort**

|                                                               | Family 60                        | Family 89 | Family 10 | Family 9 | Family 28 | Family 94 |
|---------------------------------------------------------------|----------------------------------|-----------|-----------|----------|-----------|-----------|
| <b>QC Filtration Steps</b>                                    |                                  |           |           |          |           |           |
| A: variants in at least one affected family                   | 33,061                           | 38,609    | 37,706    | 31,975   | 33,090    | 32,727    |
| B: functional variants                                        | 18,455                           | 21,857    | 21,255    | 17,602   | 18,417    | 18,118    |
| C: FC-specific variants                                       | 1,489                            | 2,041     | 1,797     | 825      | 1,089     | 882       |
| D: variants after exclusion of most variable exonic genes     | 999                              | 1,388     | 1,157     | 595      | 670       | 627       |
| E: variants in fewer than five samples from in-house database | 403                              | 581       | 509       | 309      | 360       | 294       |
| F: variants in at least two affected families                 | 178                              | 258       | 226       | 50       | 236       | 201       |
| G: deleterious variants <sup>a</sup> (genes)                  | 79 (78)                          | 109 (108) | 103 (102) | 15 (15)  | 99 (90)   | 67 (64)   |
| H: genes with cross-family recurrent variants (variants)      | 6 (6)                            | 7 (7)     | 6 (6)     | 2 (2)    | 8 (9)     | 11 (13)   |
| <b>Results of Initial Cohort for All Six Families</b>         |                                  |           |           |          |           |           |
| Genes with cross-family recurrent variants (variants)         | 19 (35)                          |           |           |          |           |           |
| Genes with different variants                                 | 11                               |           |           |          |           |           |
| Genes with at least two different variants                    | 1 ( <i>RNF213</i> ) <sup>b</sup> |           |           |          |           |           |

<sup>a</sup>PP2 > 0.8 or GERP > 2 and frameshift.  
<sup>b</sup>p = 0.01 (VT test) after Bonferroni correction (5,000 permutations).

and variant prioritization, 79, 109, 103, 15, 99, and 67 FC-specific deleterious variants segregated across more than two affected individuals in each of the six families (Table 1, row G). 35 of these variants defined 19 genes with variants in more than one family, and 11 of these 19 contained 25 distinct variants (Table 2). Interestingly, one of the 11 genes, *RNF213*, revealed five distinct variants in four families (Table 2 and Figure 1). These *RNF213* variants (GenBank: NM\_001256071.2) included a nonsense mutation (c.11413del [p.Glu3806Argfs\*27]), an exonic splicing mutation (c.2017C>T [p.Arg673Trp]), and three missense mutations (c.13577T>C [p.Ile4526Thr], c.6980A>G [p.Asn2327Ser], and c.3134C>T [p.Ser1045Leu] [GenBank: NM\_020954.3 and NP\_066005.2]). Only the c.6980A>G and c.3134C>T variants were observed once each in 189 FC control individuals. Variation burden of the 11 genes is displayed in Table 3. After Bonferroni correction for multiple testing, only *RNF213* still differed significantly between affected and control individuals ( $p = 0.013$ ).

### Target Resequencing

After Fluidigm capture and sequencing, the average coverage for the *RNF213* targeted region of each individual ranged between 6,828 $\times$  and 227,160 $\times$ . Only 4% of individuals had  $\leq 70\%$  of the total target region covered at less than 100 $\times$ .

272 exonic variants were first observed across the validation cohort of 311 samples (223 affected and 88 control individuals), and after IGV examination, 142 variants were used for the study (the remaining variants were deemed to be false positives because they were either located in

adapters or introduced by PCR duplicates). Non-coding and synonymous variants were further removed from the 142 variants, leaving 60 variants for the final analysis. Additionally, 44 functional *RNF213* variants were also found in 189 FC population control individuals.

### SKAT Analysis and *RNF213* Rare Variants in FC Individuals

In total, 72 functional (missense, indel, and splice) *RNF213* variants were observed in FC individuals, including 233 IA subjects (10 from nuclear families of the discovery cohort and 223 from the validation cohort) and 277 control individuals (88 from the validation cohort and 189 from exome control populations) (Table S5). Hardy-Weinberg equilibrium (HWE) and a missingness test were performed with PLINK 1.9, but no variant was removed.

The SKAT-O test using logistic weights to compare *RNF213* functional variants showed significantly different allelic distributions between the 233 FC IA-affected and 277 control individuals ( $p = 0.008$ ), and the difference was even more significant when only rare functional variants ( $p = 0.006$ ) were compared. When FC affected individuals were compared to only 88 IA-negative controls, the difference remained significant ( $p = 0.018$ ); adding sex as a covariate slightly increased the difference ( $p = 0.013$ ).

It is also noteworthy that among the 34 rare functional *RNF213* variants that were observed in 233 IA subjects, 18 were absent from all control individuals (Table S5), and 13 of these 18 were predicted to be probably deleterious (PolyPhen-2 score > 0.8 or GERP++ score > 2) (Table 4). On the other hand, 30 rare functional variants

**Table 2. Prioritized Genes with FC-Specific Deleterious Variants**

| Gene (MIM)              | Position          | Variant (GenBank)         |                                  | Family | PolyPhen-2 Score | GERP++ Score |
|-------------------------|-------------------|---------------------------|----------------------------------|--------|------------------|--------------|
|                         |                   | cDNA                      | Amino Acid                       |        |                  |              |
| <i>ABCA10</i> (612508)  | chr17: 67,215,903 | c.313A>G (NM_080282)      | p.Asn105Asp (NP_525021)          | 60     | 0.995            | 1.83         |
|                         | chr17: 67,221,498 | c.2T>C (NM_080282)        | p.Met1Thr (NP_525021)            | 94     | 0.998            | 3.6          |
| <i>AIM1</i> (601797)    | chr6: 107,008,779 | c.4733G>T (NM_001624)     | p.Gly1578Val (NP_001615)         | 89     | 1                | 3.4          |
|                         | chr6: 106,968,391 | c.2084C>A (NM_001624)     | p.Ser695Tyr (NP_001615)          | 94     | 0.966            | 5.62         |
| <i>CDAN1</i> (607465)   | chr15: 43,028,521 | c.548C>T (NM_138477)      | p.Ser183Leu (NP_612486)          | 89     | 0.127            | 3.91         |
|                         | chr15: 43,023,250 | c.1880C>T (NM_138477)     | p.Ala627Val (NP_612486)          | 28     | 0.007            | 5.49         |
| <i>GPATCH8</i> (614396) | chr17: 42,477,055 | c.2390G>A (NM_001002909)  | p.Arg797Gln (NP_001002909)       | 28     | 0.658            | 2.67         |
|                         | chr17: 42,475,271 | c.4174G>A (NM_001002909)  | p.Gly1392Ser (NP_001002909)      | 10     | 0.98             | 4.57         |
| <i>HELZ2</i> (611265)   | chr20: 62,196,325 | c.2143C>T (NM_033405)     | p.Arg715Trp (NP_208384)          | 28     | 0.858            | 4.11         |
|                         | chr20: 62,195,122 | c.3346C>T (NM_033405)     | p.Arg1116Trp (NP_208384)         | 60     | 1                | -0.842       |
| <i>RNF213</i> (613768)  | chr17: 78,272,125 | c.2017C>T (NM_001256071)  | p.Arg673Trp (NP_001243000)       | 28     | 0.997            | 0.06         |
|                         | chr17: 78,319,115 | c.6980A>G (NM_001256071)  | p.Asn2327Ser (NP_001243000)      | 60     | 0.006            | 2.19         |
|                         | chr17: 78,293,222 | c.3134C>T (NM_020954.3)   | p.Ser1045Leu (NP_066005.2)       | 10     | 0.496            | 2.628        |
|                         | chr17: 78,353,451 | c.13577T>C (NM_001256071) | p.Ile4526Thr (NP_001243000)      | 94     | 0.291            | 2.81         |
|                         | chr17: 78,336,958 | c.11413del (NM_001256071) | p.Glu3806Argfs*27 (NP_001243000) | 60     | -                | -            |
| <i>OR11H1</i>           | chr22: 16,449,405 | c.400G>A (NM_001005239)   | p.Ala134Thr (NP_001005239)       | 89     | 0.852            | 0.664        |
|                         | chr22: 16,449,399 | c.406G>A (NM_001005239)   | p.Asp136Asn (NP_001005239)       | 10     | 0.988            | 1.84         |
| <i>PLEC</i> (601282)    | chr8: 144,998,555 | c.5542C>T (NM_201384)     | p.Leu1848Phe (NP_958786)         | 60     | 0.726            | 4.06         |
|                         | chr8: 144,996,050 | c.7939G>T (NM_201384)     | p.Asp2647Tyr (NP_958786)         | 89     | 0.992            | 0.966        |
| <i>RTTN</i> (610436)    | chr18: 67,806,837 | c.2786G>A (NM_173630)     | p.Arg929Lys (NP_775901)          | 94     | 0.985            | 4.96         |
|                         | chr18: 67,742,698 | c.4454A>G (NM_173630)     | p.His1485Arg (NP_775901)         | 89     | 0.043            | 2.92         |
| <i>SF3A2</i> (600796)   | chr19: 2,248,232  | c.1082C>G (NM_007165)     | p.Ala361Gly (NP_009096)          | 28     | 0.474            | 2.57         |
|                         | chr19: 2,245,459  | c.260C>T (NM_007165)      | p.Ala87Val (NP_009096)           | 94     | 0.024            | 4.54         |
| <i>ZNF335</i> (610827)  | chr20: 44,577,719 | c.3902C>T (NM_022095)     | p.Ala1301Val (NP_071378)         | 60     | 0.201            | 4.91         |
|                         | chr20: 44,596,594 | c.593A>G (NM_022095)      | p.Asp198Gly (NP_071378)          | 10     | 0.977            | 3.92         |

were observed in 277 control individuals, and 14 (only 4 of which were predicted to be deleterious) were absent from affected individuals (Table S5 and Table 4). Hence, there is a significant difference between the number of deleterious variants observed in affected and control individuals ( $p = 0.00006$ , binomial test). 25 FC IA individuals from 249 discovery and validation cohorts carry 14 rare deleterious *RNF213* variants (13 plus c.11413del [p.Glu3806Argfs\*27]) that are absent in FC control individuals. Of these 25 individuals, 9 had multiple IAs, 8 had SAHs, 8 had hypertension, and 3 had hypercholesterolemia; 2 of these last 3 also had myocardial infarctions. Only 6 individuals had no other recorded clinical histories besides smoking.

### *RNF213* Common Variants in a Population-Based Study

Among 257 IA-affected and 1,988 control individuals with SNP-chip genotyping data, PCA analysis showed that 3 IA-

affected and 92 control individuals presented with an admixture of East Asian and African ancestry, and these samples were excluded from subsequent analysis (Figure S1). We performed a gene-wide association test on 38 polymorphic SNPs across the *RNF213* loci in 254 affected and 1,896 control individuals, and the SNP rs6565666 appeared to be significantly associated with IA subjects (Cochran-Armitage trend test:  $p = 0.03$  after Bonferroni correction; Table S6).

The pairwise  $F_{ST}$  comparisons between 1KGP phase 3 populations and FC individuals suggest that the common SNPs of *RNF213* vary between populations. FC individuals have a higher number of distinct variations than do South Americans, followed by Africans and East Asians. However, East Asians share fewer *RNF213* functional variations with the FC population than they do with the African and Caribbean populations (Figure 2). Overall, eight *RNF213* SNPs appear to be outliers in the frequency changes across

**Table 3. Mutation Burden of 11 Prioritized Genes between FC IA-Affected and Control Individuals**

| Gene           | Risk/Total Alleles <sup>a</sup> |                     | VT Statistic | p Value (Unadjusted)    | SE       | Permutations |
|----------------|---------------------------------|---------------------|--------------|-------------------------|----------|--------------|
|                | Affected Individuals            | Control Individuals |              |                         |          |              |
| <i>ABCA10</i>  | 2/36                            | 2/212               | 0.709677     | 0.0775845               | 0.347336 | 5,000        |
| <i>AIM1</i>    | 2/36                            | 3/212               | 0.569837     | 0.126873                | 0.339132 | 1,000        |
| <i>CDAN1</i>   | 2/36                            | 2/212               | 0.709677     | 0.0771846               | 0.346911 | 5,000        |
| <i>GPATCH8</i> | 2/36                            | 1/212               | 0.903274     | 0.0259948               | 0.345287 | 5,000        |
| <i>HELZ2</i>   | 2/36                            | 4/212               | 0.569837     | 0.135864                | 0.340307 | 1,000        |
| <i>OR11H1</i>  | 2/36                            | 3/212               | 1.20892      | 0.0195961               | 0.398189 | 5,000        |
| <i>PLEC</i>    | 2/36                            | 15/212              | 0.121577     | 0.532468                | 0.376399 | 1,000        |
| <i>RNF213</i>  | 5/36                            | 4/212               | 1.50576      | 0.00119976 <sup>b</sup> | 0.354706 | 5,000        |
| <i>RTTN</i>    | 2/36                            | 5/212               | 0.371868     | 0.260739                | 0.344665 | 1,000        |
| <i>SF3A2</i>   | 2/36                            | 2/212               | 0.903274     | 0.0313937               | 0.325226 | 5,000        |
| <i>ZNF335</i>  | 2/36                            | 1/212               | 0.903274     | 0.0269946               | 0.378224 | 5,000        |

<sup>a</sup>Risk alleles are those harboring FC-specific deleterious variants; total alleles include the founder alleles of six IA-affected families.

<sup>b</sup>Corrected p = 0.013.

the worldwide populations, and four of these SNPs are located in the 3' region. It also appeared that more functional variants of *RNF213* were possibly affected by genetic drift (Figure S2).

A burden test comparing the FC population to other populations showed a similar trend—East Asians (followed by Peruvians, Indians, and Finnish) appeared to have the most significant difference of derived *RNF213* allele frequencies in comparison to the overall FC population. As expected, FC IA individuals also had a significantly higher burden of *RNF213* than control individuals did (Table 5).

### Functional Characterization of Selected *RNF213* Variants

Among the 14 *RNF213* variants predicted to be deleterious and specific to IA individuals, only two variants, p.Arg2438Cys (c.7312C>T) and p.Ala2826Thr (c.8476G>A), were located in the two distinct AAA+ modules of the protein. These two variants were therefore the most suitable for a functional test measuring the ATPase activity of *RNF213*. As previously reported,<sup>41</sup> this activity can be detected with a recombinant fragment containing amino acids 2,370–2,632 and 2,717–3,004.

The baseline of ATP hydrolysis was determined by GST. As a result, the average ATPase activity of the first AAA+ wild-type protein (A1WT) and the p.Arg2438Cys variant (A1M) was estimated to be 72.0 and 142.1 nmol/mg/min, respectively, whereas that of the LOF variants in the walker A domain (A1WA) and walker B domain (A1WB) was estimated to be 12.2 and 23.1 nmol/mg/min, respectively. The average ATPase activity of the second AAA+ wild-type protein (A2WT) and the p.Ala2826Thr variant (A2M) was estimated to be 127.1 and 242.6 nmol/mg/min, respectively, whereas that of the A2WA and

A2WB variants was as low as 8.8 and 15.5 nmol/mg/min, respectively. Compared to their respective wild-type proteins, both variants showed significant increases in ATPase activity (Mann-Whitney-Wilcoxon Test:  $p_{A1M-A1WT} = 0.015$ ,  $p_{A2M-A2WT} = 0.0003$ ); the differences were also significant in comparison to activity of the LOF variants (Mann-Whitney-Wilcoxon test:  $p_{A1M-A1WA} = 0.002$ ,  $p_{A1M-A1WB} = 0.002$ ,  $p_{A2M-A2WA} = 0.0007$ ,  $p_{A2M-A2WB} = 0.0009$ ) (Figure 3).

### Discussion

A major weakness of using a GWAS approach for IAs is that the effects of rare variants and population-specific variants are not well addressed. Recently, two studies<sup>42,43</sup> using exome sequencing on multiple IA-affected families attempted to address the issue. Although no recurrent mutations were found, using different hypotheses and different populations, they reported 68 genes<sup>42</sup> and 78 genes.<sup>43</sup> Only one gene, *ITGB6* (MIM: 147558), was found to be common across the two lists established by these two studies; nonetheless, neither study deemed this to be an interesting IA candidate gene. We believe that genetic heterogeneity is most likely at play in the development of IAs in distinct populations. Therefore, we conducted this research exclusively in FC individuals and focused on finding genes that harbor founder mutations or haplotypes in FC individuals as candidates for predisposition to IAs. Although our exome sequencing results for the first six FC families strongly suggest that rare, deleterious *RNF213* variants predispose to IAs in FC individuals, some other interesting variants are worth noting, such as *ABCA10* (MIM: 612508), which is expressed predominately in intracranial vascular endothelia cells.<sup>44</sup>

**Table 4. RNF213 Deleterious Variants Found Exclusively in Affected or Control Individuals**

| Position   | Variant                       | Affected Individuals (n = 233) | Control Individuals (n = 277) | PolyPhen-2 Score | GERP++ Score | Frequency in EVS |
|------------|-------------------------------|--------------------------------|-------------------------------|------------------|--------------|------------------|
| 78,264,463 | c.1208_1210del (p.403_404del) | 1                              | 0                             | 1                | 0            | 0.001917         |
| 78,268,746 | c.1699A>G (p.Met567Val)       | 1                              | 0                             | 0.999            | 2.72         | 0                |
| 78,272,125 | c.2017C>T (p.Arg673Trp)       | 3                              | 0                             | 0.997            | 0.06         | 0                |
| 78,305,962 | c.3674A>G (p.Asp1225Gly)      | 1                              | 0                             | 0.919            | 0            | 0                |
| 78,319,447 | c.7312C>T (p.Arg2438Cys)      | 1                              | 0                             | 0.655            | 2.35         | 0.000077         |
| 78,320,611 | c.8476G>A (p.Ala2826Thr)      | 1                              | 0                             | 1                | 5.59         | 0                |
| 78,321,697 | c.9562G>A (p.Val3188Met)      | 1                              | 0                             | 0.96             | 5.36         | 0                |
| 78,321,844 | c.9709C>A (p.Gln3237Lys)      | 3                              | 0                             | 0.264            | 2.61         | 0                |
| 78,345,744 | c.12496G>A (p.Asp4166Asn)     | 1                              | 0                             | 1                | 5.02         | 0.000923         |
| 78,346,877 | c.12854G>A (p.Ser4285Asn)     | 1                              | 0                             | 0.024            | 2.7          | 0.000077         |
| 78,348,389 | c.13074G>A (p.Lys4358Lys)     | 1                              | 0                             | 1                | 0            | 0                |
| 78,353,451 | c.13577T>C (p.Ile4526Thr)     | 3                              | 0                             | 0.290848         | 2.81         | 0                |
| 78,363,707 | c.15275G>A (p.Arg5092Gln)     | 1                              | 0                             | 0.998            | 3.14         | 0.000077         |
| 78,321,941 | c.9806G>A (p.Arg3269Gln)      | 0                              | 2                             | 1                | 3.02         | 0.000077         |
| 78,328,364 | c.10850C>T (p.Ala3617Val)     | 0                              | 1                             | 0.555            | 4.79         | 0                |
| 78,291,060 | c.2884G>A (p.Glu962Lys)       | 0                              | 1                             | 0.068            | 3.66         | 0                |
| 78,321,560 | c.9425T>C (p.Val3142Ala)      | 0                              | 1                             | 0.998            | 5.09         | 0                |

**Functional Characterization of RNF213 and Variants**

*RNF213* has been identified as an important candidate for MMD in the Japanese population.<sup>39,45</sup> MMD is a rare cerebrovascular disorder characterized by stenosis of the inter-

nal carotid arteries and abnormal angiogenesis. It is a population-specific condition with an extremely low prevalence in Western populations. A founder mutation, c.14429G>A (p.Arg4810Lys) (rs112735431), previously

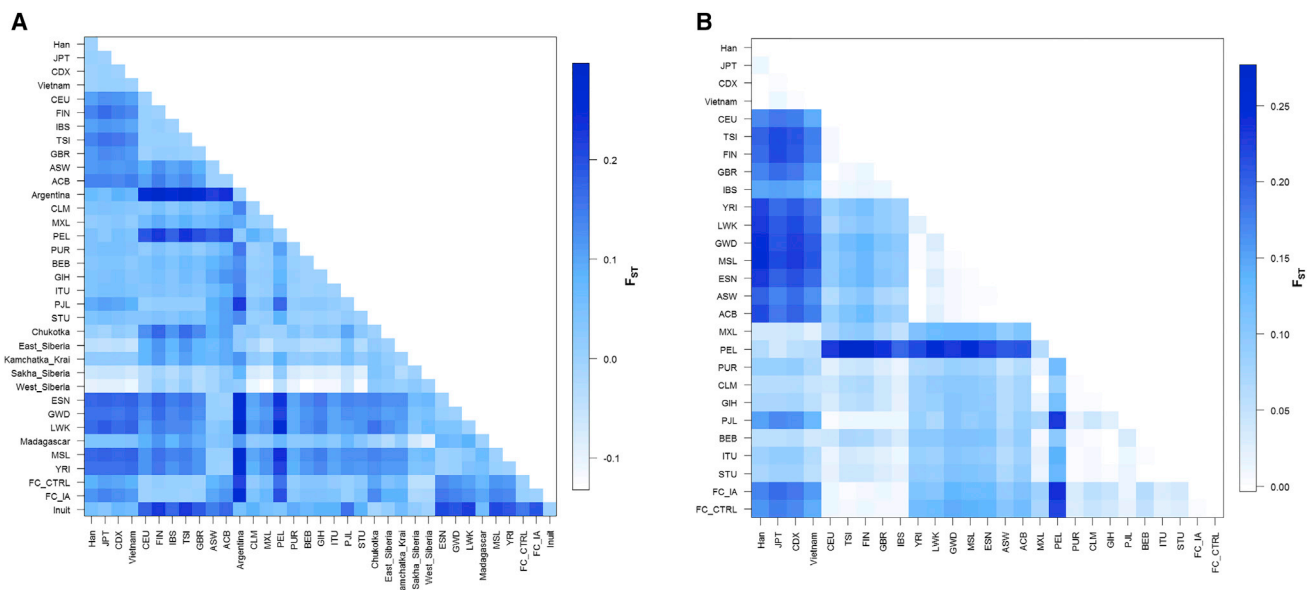**Figure 2. Matrix of Pairwise  $F_{ST}$  of *RNF213* across Worldwide Populations**

$F_{ST}$  was calculated for *RNF213* common variants from the Omni chip (A) and functional variants from exome sequencing and (B) between each two populations. FC\_CTRL and FC\_IA are the FC control cohort and the IA cohort, respectively; other populations are indicated by the three-letter codes used by 1KGP. The allele distributions of *RNF213* common SNPs vary among populations, suggesting the existence of genetic drift. Among others, there is a big difference in the allelic distributions of *RNF213* functional variants between Asians and FC populations.

**Table 5. RNF213 Variable Thresholds between FC and 1KGP Populations**

| Population | Sample | No. of Variants | Total MAC | Statistic  | p Value    | SE       | Permutations |
|------------|--------|-----------------|-----------|------------|------------|----------|--------------|
| CHB        | 380    | 55              | 2,333     | 3.95287    | 0.00019996 | 0.364289 | 5,000        |
| JPT        | 381    | 54              | 2,453     | 1.79685    | 0.00119976 | 0.346035 | 5,000        |
| CDX        | 370    | 54              | 2,306     | 3.21125    | 0.00019996 | 0.343601 | 5,000        |
| KHV        | 376    | 51              | 2,322     | 3.61053    | 0.00019996 | 0.355326 | 5,000        |
| CEU        | 376    | 54              | 2,187     | 0.955313   | 0.113629   | 0.346662 | 3,000        |
| TSI        | 384    | 54              | 2,151     | 1.23624    | 0.0319936  | 0.364394 | 5,000        |
| GBR        | 368    | 52              | 2,108     | 1.0242     | 0.0657868  | 0.349268 | 5,000        |
| FIN        | 376    | 51              | 2,104     | 1.48321    | 0.00679864 | 0.358871 | 5,000        |
| IBS        | 384    | 57              | 2,250     | 1.01387    | 0.124875   | 0.388177 | 1,000        |
| YRI        | 385    | 83              | 2,666     | 0.741073   | 0.361638   | 0.421002 | 1,000        |
| LWK        | 376    | 80              | 2,545     | -0.0442278 | 0.936064   | 0.415337 | 1,000        |
| GWD        | 390    | 81              | 2,763     | -0.0641889 | 0.924076   | 0.433297 | 1,000        |
| MSL        | 362    | 82              | 2,440     | -0.177864  | 0.973027   | 0.401114 | 1,000        |
| ESN        | 376    | 84              | 2,598     | -0.6186    | 0.998002   | 0.436067 | 1,000        |
| ASW        | 338    | 82              | 2,173     | -1.80752   | 1          | 0.39357  | 1,000        |
| ACB        | 373    | 82              | 2,552     | -0.38227   | 0.99001    | 0.43374  | 1,000        |
| MXL        | 341    | 55              | 2,060     | 0.660489   | 0.275724   | 0.302976 | 1,000        |
| PUR        | 381    | 66              | 2,335     | -0.359017  | 0.995005   | 0.379015 | 1,000        |
| CLM        | 371    | 69              | 2,293     | -0.673233  | 1          | 0.420994 | 1,000        |
| PEL        | 362    | 58              | 2,313     | 1.48289    | 0.0039992  | 0.350589 | 5,000        |
| GIH        | 380    | 53              | 2,312     | 1.47606    | 0.00559888 | 0.355099 | 5,000        |
| PJL        | 373    | 56              | 2,169     | 1.07995    | 0.0631874  | 0.351286 | 5,000        |
| BEB        | 363    | 58              | 2,212     | 0.293378   | 0.743257   | 0.33014  | 1,000        |
| STU        | 379    | 56              | 2,278     | 0.959633   | 0.135864   | 0.362751 | 1,000        |
| ITU        | 379    | 57              | 2,271     | 0.434712   | 0.601399   | 0.349177 | 1,000        |
| FC_IA      | 513    | 72              | 2,938     | 1.69234    | 0.0125975  | 0.454633 | 5,000        |

Abbreviations are as follows: MAC, minor allele count; CHB, Han Chinese in Beijing, China; JPT, Japanese in Tokyo, Japan; CDX, Chinese Dai in Xishuangbanna, China; KHV, Kinh in Ho Chi Minh City, Vietnam; CEU, Utah residents with northern and western European ancestry from the CEPH collection; TSI, Toscani in Italia; GBR, British in England and Scotland; FIN, Finnish in Finland; IBS, Iberian population in Spain; YRI, Yoruba in Ibadan, Nigeria; LWK, Luhya in Webuye, Kenya; GWD, Gambian in western divisions in the Gambia; MSL, Mende in Sierra Leon; ESN, Esan in Nigeria; ASW, Americans of African ancestry in southwest USA; ACB, African Caribbeans in Barbados; MXL, Mexican ancestry from Los Angeles, USA; PUR, Puerto Ricans from Puerto Rico; CLM, Colombians from Medellin, Colombia; PEL, Peruvians from Lima, Peru; GIH, Gujarati Indian from Houston, Texas; PJL, Punjabi from Lahore, Pakistan; BEB, Bengali from Bangladesh; STU, Sri Lankan Tamil from the UK; ITU, Indian Telugu from the UK; and FC\_IA, French-Canadian individuals with intracranial aneurysms.

annotated as c.14576G>A (p.Arg4859Lys) (GenBank: XM\_005257545.3 and XP\_005257602.2),<sup>45</sup> was found to be significantly and specifically associated with the disease in the East Asian population.<sup>39</sup> However, in a study looking at French MMD subjects, there was no evidence linking *RNF213* to MMD,<sup>46</sup> and another recent study further reported that *ZXDC* and *OBSCN* had higher variation burden in affected individuals of European descent, suggesting the complexities of the MMD genetic etiology.<sup>47</sup>

*RNF213* encodes an AAA-type ATPase with E3 ubiquitin ligase activity, and studies have suggested a role in vascular-wall construction.<sup>39</sup> A functional study focused on RNF213 p.Arg4810Lys suggested that the founder mutation is a MMD risk factor through reduced angiogenic

activity<sup>48,49</sup> and induced mitotic abnormalities.<sup>50</sup> When exploring the functions of *RNF213*, studies have found the gene to be linked to a variety of artery-wall developments. Several studies conducted on *Rnf213*-knockout mice have shown thinning of the intima and media layer after ligation of the common carotid artery,<sup>51</sup> thinning in vascular walls and increased *Mmp9* expression,<sup>52</sup> or enhanced post-ischemic angiogenesis;<sup>53</sup> a recent report also showed that *RNF213* was associated with inflammatory responses and angiogenesis.<sup>49,54</sup> All of these results suggest that *RNF213* is involved in vascular remodeling processes. A recent study even showed that RNF213 is associated with aneurysm formation after anastomotic surgery.<sup>55</sup>



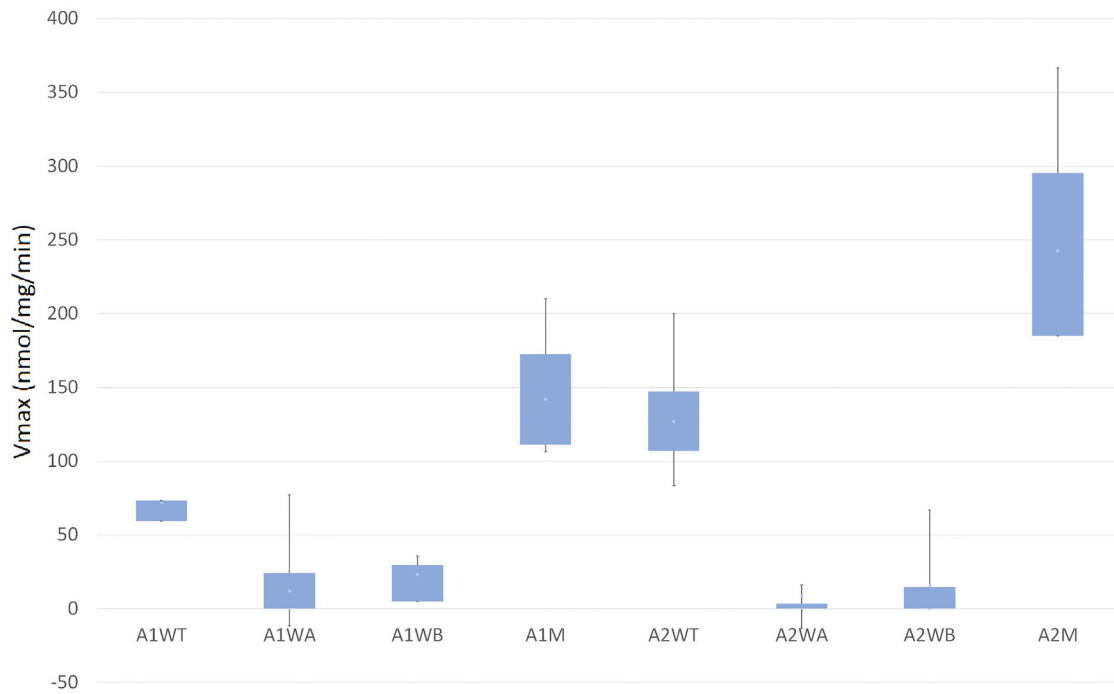

**Figure 3. ATPase Activity of the Wild-Types, Variants, and LOF Controls of the Two AAA+ Domains of RNF213**

Box-and-whisker plot showing ATPase activity measured as nmol of free-phosphate release per mg protein per minute. A1WT and A2WT are the wild-types of the first and second AAA+ modules, respectively; A1M and A2M are the p.Arg2438Cys and p.Ala2826Thr variants, respectively. A1WA, A1WB, A2WA, and A2WB are four LOF controls (p. Lys2426Ala, p. Glu2488Ala, p. Lys2775Ala, and p. Glu2845Ala, respectively) located in the walker A and B domains of the first and second AAA+ modules. The results were generated by eight ATPase assays from two independent cell cultures; each sample is measured in duplicate. Boxes show the interquartile range, and whiskers show maximum and minimum measurements.

In addition to being associated with MMD, *RNF213* has also been associated with other vascular disorders,<sup>56</sup> such as fibromuscular dysplasia (MIM: 135580),<sup>57</sup> high blood pressure,<sup>58</sup> intracranial major artery stenosis,<sup>59,60</sup> and heterogeneous intracerebral vasculopathy.<sup>61</sup> The p.Arg4810Lys variant in *RNF213* is suggested to be a risk factor for MMD by causing stenosis;<sup>60,62</sup> other variants, however, might have different effects on the artery. Some studies have suggested that other *RNF213* variants are associated with different types of MMD, i.e., rare variant p.Ala4399Thr, which is intermediately frequent in East Asians, is associated with hemorrhage-type MMD,<sup>63</sup> and p.Arg4810Lys is associated with the ischemia type.

Rare variants in *RNF213* have been found in MMD-affected individuals without p.Arg4810Lys and who are of Japanese,<sup>64</sup> Taiwanese,<sup>65</sup> and non-Asian<sup>56</sup> ethnicities. Of the 30 rare functional variants found in 649 MMD-affected and control individuals in Japan, 16 were observed only in affected individuals; additionally, 3 novel variants were found in 31 Taiwanese MMD subjects, and 7 rare variants were found in 24 individuals with diverse ethnicities. Compared to those of the Japanese case-control study,<sup>64</sup> our results show a significantly larger proportion of *RNF213* mutations in affected individuals than in controls individuals (Cochran-Mantel-Haenszel test:  $p < 0.0001$ ) (Figure 4).

#### AAA+ ATP Domain Variants and the Risk of IAs

One of the very important functions of *RNF213* is most likely mediated by the two AAA+ regions, which are encoded by exon 29 and exhibit ATPase activity.<sup>41</sup> In our IA study, we found several deleterious variants in the AAA+ domains, whereas other studies focused on MMD-affected individuals did not (Figure 5).<sup>56,66</sup> We can assume that variants in different locations of *RNF213* act as risk factors for different cerebrovascular disorders by affecting gene function differently. Whereas Cecchi et al.<sup>56</sup> suggested that the C-terminal domain of *RNF213* is the main risk region for MMD, we believe that exon 29, which encodes AAA+ domains, might be the risk region for IAs.

In our study, we found that a gain of ATPase activity could lead to increased risk of IAs. In contrast, a recent study suggested that p.Glu2488Gln in the first AAA+ domain and the p.Arg4810Lys variant reduced protein ATPase activity in the MMD model<sup>49</sup> and thus inhibited angiogenesis. The discordance could be due to the pathological differences between MMD and IAs; although both have disrupted vascular walls, the main characteristic of MMD is progressive stenosis accompanied by aberrant angiogenesis of collateral vasculature,<sup>67</sup> whereas IA lesions are characterized by vascular-wall weakness and dilatation accompanied by vascular remodeling and inflammatory response. Actually, the increased angiogenic activity might

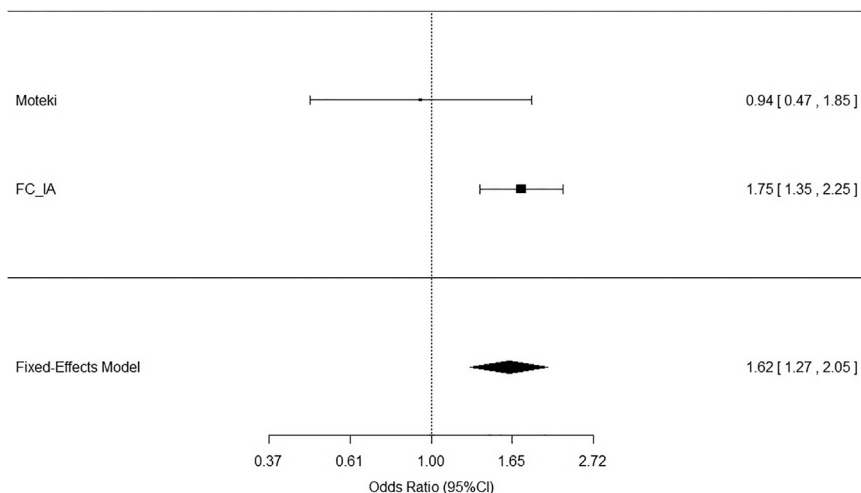

**Figure 4. Meta-analysis of Two *RNF213* Studies in Different Populations**

Forest plot of Moteki et al.<sup>64</sup> and the current study. Results show significantly more *RNF213* mutations in FC IA-affected individuals (Cochran-Mantel-Haenszel test:  $p < 0.0001$ ). Error bars represent confidence intervals, shown on the right.

be a characteristic of the formation of aneurysm lesions,<sup>68</sup> and some studies have suggested high expression of angiogenic factors in IA tissues.<sup>69,70</sup> Another paper also stated that the ATP concentration is lower in aneurysm walls than in normal artery tissue.<sup>71</sup> We hypothesize that increased ATPase activity of *RNF213* could lead to an increased or unbalanced level of angiogenesis and therefore be associated with the formation of aneurysmal lesions. Although *Rnf213*-knockout models inflict different angiogenesis alternations under different circumstances,<sup>49,53</sup> we imply that *RNF213* is critical in vascular-wall remodeling, which can explain the pathogenesis of both MMD and IAs. Additionally, the increased ATP hydro-

lysis could also affect the oxidative phosphorylation process,<sup>72</sup> which plays an important role in hypertension<sup>73</sup> and heart failure. In our study, both IA individuals carrying variants in the AAA+ domains showed signs of hypertension; one was recorded to also suffer from multiple cardiovascular problems, including hypercholesterolemia, myocardial infarction, and arrhythmia.

### *RNF213* Variants in General Populations

We found that *RNF213* SNP rs6565666 was associated with IAs in FC individuals. Interestingly, compared to other populations, FC IA individuals showed a gradual decrease in the frequency of the non-ancestral allele (A), which matches the out-of-Africa migration pattern (Figure S3) and could be the result of genetic drift, given that this non-ancestral allele might also be a risk allele for IAs (corrected  $p = 0.007$  for the dominant model of allele A). The Finnish have a relatively high frequency of allele A

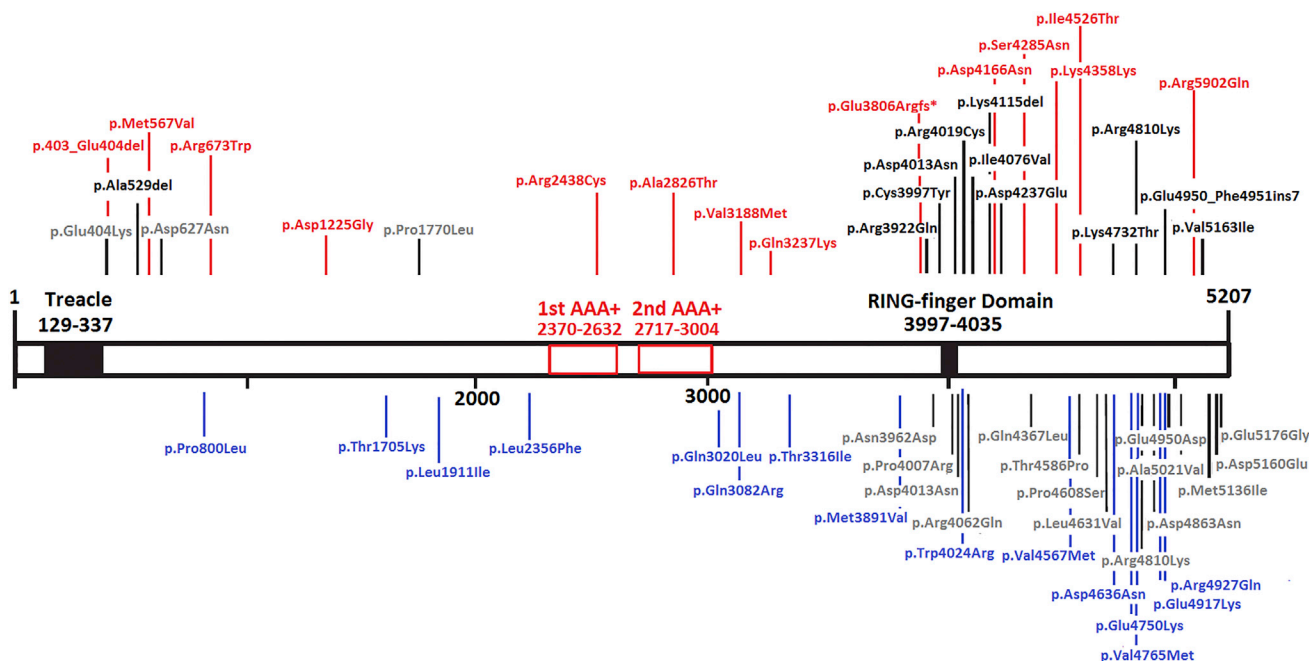

**Figure 5. *RNF213* Rare Functional Variants Exclusively Found in IA- and MMD-Affected Individuals**

Adapted from Cecchi et al.<sup>56</sup> and Koizumi et al.<sup>66</sup> 14 variants found in the current study are marked in red, variants reported in Moteki et al.<sup>64</sup> are marked in blue, MMD variants reported in Cecchi et al. are marked in black, and MMD variants found in other studies are marked in gray. The results show that FC IA-affected individuals harbor more deleterious mutations in the AAA+ domains than other populations do.

(MAF = 0.26) in comparison to other European populations (CEU MAF = 0.18), which correlates with their high incidence of IA.<sup>74,75</sup>

When further exploring the distributions of *RNF213* variants across populations, we noted that groups of Native American populations (Inuit, Argentinians, and Peruvians) diverged the most from other populations, which fits the migration patterns. However, when we focused on potential functional variants of *RNF213*, East Asians (Chinese, Japanese, and Vietnamese) seemed to have the highest diversity (Figure 2). These results seem to agree with the fact that *RNF213* East-Asian-specific variants are risk factors for MMD, which also has a high prevalence in East Asians. The significant difference in *RNF213* burden between the FC and East Asian populations further suggests that the variations in this gene lead to different levels of risk in these two populations. The potential genetic drift of *RNF213* variations could explain the difference between MMD prevalence and *RNF213* founder variants in East Asians, but not in other populations. Exploring differences in *RNF213* variants between populations also provided additional evidence that the risk gene associated with IAs could be ethnically different.<sup>75</sup> Additionally, because some studies have suggested that the Inuit have a high prevalence of IAs, it would be interesting to see whether other Native Americans also have this predisposition. Nevertheless, given our observations, we can also assume that *RNF213* might not be a risk factor for IAs among those populations.

Because of the limited number of subjects, we could not determine any founder mutation that was both highly frequent in FC individuals and significantly associated with IAs. The control populations used in this study were mostly unscreened for IAs, which could also have led to an underlying bias in our results. Only 10% of the affected individuals carry rare, deleterious variants in *RNF213*, suggesting that this gene is only a risk factor for some of the affected individuals and that IA pathogenesis is very complex and heterogeneous. Additionally, because *RNF213* mutations have not been reported in IA subjects of other ethnicities and the risk genes for MMD also differ across populations, *RNF213* variations might be associated with different vascular disorders in different populations. We further assume that different genes are likely to contribute to IAs in other populations.

In conclusion, our study supports a role for *RNF213* as a risk factor for IAs, possibly via variants that affect different portions of the protein and lead to increased ATPase activity.

### Supplemental Data

Supplemental Data include three figures and six tables and can be found with this article online at <http://dx.doi.org/10.1016/j.ajhg.2016.09.001>.

### Acknowledgments

P.X. and Z.G.O. are recipients of a fellowship from the Canadian Institutes of Health Research. G.A.R. funded this study from the Canadian Hearth and Stroke Foundation. G.A.R. holds the Canada's Research Chair in Neurogenetics and the Wilder Penfield Chair in Neuroscience. The NeuroX SNP genotyping was partially funded by a grant from the Michael J. Fox Foundation to Z.G.O.

Received: April 22, 2016

Accepted: September 6, 2016

Published: October 13, 2016

### Web Resources

IGV, <http://www.broadinstitute.org/igv/>

NCBI Genome build GRCh37, [ftp://gsapubftp-anonymous@ftp.broadinstitute.org/bundle/2.8/b37/human\\_g1k\\_v37.fasta.gz](ftp://gsapubftp-anonymous@ftp.broadinstitute.org/bundle/2.8/b37/human_g1k_v37.fasta.gz)

OMIM, <http://www.omim.org>

RefSeq, <http://www.ncbi.nlm.nih.gov/refseq/>

### References

1. Stehbens, W.E. (1983). The Pathology of Intracranial Arterial Aneurysms and Their Complications. In *Intracranial Aneurysms*, J.L. Fox, ed. (Springer-Verlag New York), pp. 272–357.
2. Rinkel, G.J. (2008). Natural history, epidemiology and screening of unruptured intracranial aneurysms. *J. Neuroradiol.* 35, 99–103.
3. Vernooij, M.W., Ikram, M.A., Tanghe, H.L., Vincent, A.J., Hofman, A., Krestin, G.P., Niessen, W.J., Breteler, M.M., and van der Lugt, A. (2007). Incidental findings on brain MRI in the general population. *N. Engl. J. Med.* 357, 1821–1828.
4. Rinkel, G.J., Djibuti, M., Algra, A., and van Gijn, J. (1998). Prevalence and risk of rupture of intracranial aneurysms: a systematic review. *Stroke* 29, 251–256.
5. Qureshi, A.I., Suri, M.F., Nasar, A., Kirmani, J.F., Divani, A.A., He, W., and Hopkins, L.N. (2005). Trends in hospitalization and mortality for subarachnoid hemorrhage and unruptured aneurysms in the United States. *Neurosurgery* 57, 1–8, discussion 1–8.
6. Feigin, V.L., Lawes, C.M., Bennett, D.A., Barker-Collo, S.L., and Parag, V. (2009). Worldwide stroke incidence and early case fatality reported in 56 population-based studies: a systematic review. *Lancet Neurol.* 8, 355–369.
7. Teunissen, L.L., Rinkel, G.J., Algra, A., and van Gijn, J. (1996). Risk factors for subarachnoid hemorrhage: a systematic review. *Stroke* 27, 544–549.
8. Brown, R.D., Jr., Wiebers, D.O., and Forbes, G.S. (1990). Unruptured intracranial aneurysms and arteriovenous malformations: frequency of intracranial hemorrhage and relationship of lesions. *J. Neurosurg.* 73, 859–863.
9. Clare, C.E., and Barrow, D.L. (1992). Infectious intracranial aneurysms. *Neurosurg. Clin. N. Am.* 3, 551–566.
10. Benoit, B.G., and Wortzman, G. (1973). Traumatic cerebral aneurysms. Clinical features and natural history. *J. Neurol. Neurosurg. Psychiatry* 36, 127–138.
11. Krischek, B., and Inoue, I. (2006). The genetics of intracranial aneurysms. *J. Hum. Genet.* 51, 587–594.
12. Bilguvar, K., Yasuno, K., Niemelä, M., Ruigrok, Y.M., von Und Zu Fraunberg, M., van Duijn, C.M., van den Berg, L.H., Mane, S., Mason, C.E., Choi, M., et al. (2008). Susceptibility loci for

- intracranial aneurysm in European and Japanese populations. *Nat. Genet.* 40, 1472–1477.
13. Foroud, T., Koller, D.L., Lai, D., Sauerbeck, L., Anderson, C., Ko, N., Deka, R., Mosley, T.H., Fornage, M., Woo, D., et al.; FIA Study Investigators (2012). Genome-wide association study of intracranial aneurysms confirms role of Anril and SOX17 in disease risk. *Stroke* 43, 2846–2852.
  14. Yasuno, K., Bilguvar, K., Bijlenga, P., Low, S.K., Krischek, B., Auburger, G., Simon, M., Krex, D., Arlier, Z., Nayak, N., et al. (2010). Genome-wide association study of intracranial aneurysm identifies three new risk loci. *Nat. Genet.* 42, 420–425.
  15. Foroud, T., Lai, D., Koller, D., Van't Hof, F., Kurki, M.I., Anderson, C.S., Brown, R.D., Jr., Connolly, E.S., Eriksson, J.G., Flaherty, M., et al.; Familial Intracranial Aneurysm Study Investigators (2014). Genome-wide association study of intracranial aneurysm identifies a new association on chromosome 7. *Stroke* 45, 3194–3199.
  16. Akiyama, K., Narita, A., Nakaoka, H., Cui, T., Takahashi, T., Yasuno, K., Tajima, A., Krischek, B., Yamamoto, K., Kasuya, H., et al. (2010). Genome-wide association study to identify genetic variants present in Japanese patients harboring intracranial aneurysms. *J. Hum. Genet.* 55, 656–661.
  17. Low, S.K., Takahashi, A., Cha, P.C., Zembutsu, H., Kamatani, N., Kubo, M., and Nakamura, Y. (2012). Genome-wide association study for intracranial aneurysm in the Japanese population identifies three candidate susceptible loci and a functional genetic variant at EDNRA. *Hum. Mol. Genet.* 21, 2102–2110.
  18. Halal, F., Mohr, G., Toussi, T., and Napoléon Martinez, S. (1983). Intracranial aneurysms: a report of a large pedigree. *Am. J. Med. Genet.* 15, 89–95.
  19. Mathieu, J., Pérusse, L., Allard, P., Prévost, C., Cantin, L., Bouchard, J.M., and DeBraekeleer, M. (1996). Epidemiological study of ruptured intracranial aneurysms in the Saguenay-Lac-Saint-Jean region (Quebec, Canada). *Can. J. Neurol. Sci.* 23, 184–188.
  20. Li, H., and Durbin, R. (2009). Fast and accurate short read alignment with Burrows-Wheeler transform. *Bioinformatics* 25, 1754–1760.
  21. Li, H., Handsaker, B., Wysoker, A., Fennell, T., Ruan, J., Homer, N., Marth, G., Abecasis, G., and Durbin, R.; 1000 Genome Project Data Processing Subgroup (2009). The Sequence Alignment/Map format and SAMtools. *Bioinformatics* 25, 2078–2079.
  22. McKenna, A., Hanna, M., Banks, E., Sivachenko, A., Cibulskis, K., Kernysky, A., Garimella, K., Altshuler, D., Gabriel, S., Daly, M., and DePristo, M.A. (2010). The Genome Analysis Toolkit: a MapReduce framework for analyzing next-generation DNA sequencing data. *Genome Res.* 20, 1297–1303.
  23. Wang, K., Li, M., and Hakonarson, H. (2010). ANNOVAR: functional annotation of genetic variants from high-throughput sequencing data. *Nucleic Acids Res.* 38, e164.
  24. Abecasis, G.R., Auton, A., Brooks, L.D., DePristo, M.A., Durbin, R.M., Handsaker, R.E., Kang, H.M., Marth, G.T., and McVean, G.A.; 1000 Genomes Project Consortium (2012). An integrated map of genetic variation from 1,092 human genomes. *Nature* 491, 56–65.
  25. Adzhubei, I.A., Schmidt, S., Peshkin, L., Ramensky, V.E., Gerasimova, A., Bork, P., Kondrashov, A.S., and Sunyaev, S.R. (2010). A method and server for predicting damaging missense mutations. *Nat. Methods* 7, 248–249.
  26. Davydov, E.V., Goode, D.L., Sirota, M., Cooper, G.M., Sidow, A., and Batzoglou, S. (2010). Identifying a high fraction of the human genome to be under selective constraint using GERP++. *PLoS Comput. Biol.* 6, e1001025.
  27. Price, A.L., Kryukov, G.V., de Bakker, P.I., Purcell, S.M., Staples, J., Wei, L.J., and Sunyaev, S.R. (2010). Pooled association tests for rare variants in exon-resequencing studies. *Am. J. Hum. Genet.* 86, 832–838.
  28. Wang, G.T., Peng, B., and Leal, S.M. (2014). Variant association tools for quality control and analysis of large-scale sequence and genotyping array data. *Am. J. Hum. Genet.* 94, 770–783.
  29. Li, H., and Durbin, R. (2010). Fast and accurate long-read alignment with Burrows-Wheeler transform. *Bioinformatics* 26, 589–595.
  30. Robinson, J.T., Thorvaldsdóttir, H., Winckler, W., Guttman, M., Lander, E.S., Getz, G., and Mesirov, J.P. (2011). Integrative genomics viewer. *Nat. Biotechnol.* 29, 24–26.
  31. Price, A.L., Patterson, N.J., Plenge, R.M., Weinblatt, M.E., Shadick, N.A., and Reich, D. (2006). Principal components analysis corrects for stratification in genome-wide association studies. *Nat. Genet.* 38, 904–909.
  32. Eichstaedt, C.A., Antão, T., Pagani, L., Cardona, A., Kivisild, T., and Mormina, M. (2014). The Andean adaptive toolkit to counteract high altitude maladaptation: genome-wide and phenotypic analysis of the Collas. *PLoS ONE* 9, e93314.
  33. Pierron, D., Razafindrazaka, H., Pagani, L., Ricaut, F.X., Antao, T., Capredon, M., Sambo, C., Radimilahy, C., Rakotoarisoa, J.A., Blench, R.M., et al. (2014). Genome-wide evidence of Austronesian-Bantu admixture and cultural reversion in a hunter-gatherer group of Madagascar. *Proc. Natl. Acad. Sci. USA* 111, 936–941.
  34. Cardona, A., Pagani, L., Antao, T., Lawson, D.J., Eichstaedt, C.A., Yngvadottir, B., Shwe, M.T., Wee, J., Romero, I.G., Raj, S., et al. (2014). Genome-wide analysis of cold adaptation in indigenous Siberian populations. *PLoS ONE* 9, e98076.
  35. Rasmussen, M., Li, Y., Lindgreen, S., Pedersen, J.S., Albrechtsen, A., Moltke, I., Metspalu, M., Metspalu, E., Kivisild, T., Gupta, R., et al. (2010). Ancient human genome sequence of an extinct Palaeo-Eskimo. *Nature* 463, 757–762.
  36. Ionita-Laza, I., Lee, S., Makarov, V., Buxbaum, J.D., and Lin, X. (2013). Sequence kernel association tests for the combined effect of rare and common variants. *Am. J. Hum. Genet.* 92, 841–853.
  37. Chang, C.C., Chow, C.C., Tellier, L.C., Vattikuti, S., Purcell, S.M., and Lee, J.J. (2015). Second-generation PLINK: rising to the challenge of larger and richer datasets. *Gigascience* 4, 7.
  38. Excoffier, L., and Lischer, H.E. (2010). Arlequin suite ver 3.5: a new series of programs to perform population genetics analyses under Linux and Windows. *Mol. Ecol. Resour.* 10, 564–567.
  39. Liu, W., Morito, D., Takashima, S., Mineharu, Y., Kobayashi, H., Hitomi, T., Hashikata, H., Matsuura, N., Yamazaki, S., Toyoda, A., et al. (2011). Identification of RNF213 as a susceptibility gene for moyamoya disease and its possible role in vascular development. *PLoS ONE* 6, e22542.
  40. Gibson, D.G., Young, L., Chuang, R.Y., Venter, J.C., Hutchison, C.A., 3rd, and Smith, H.O. (2009). Enzymatic assembly of DNA molecules up to several hundred kilobases. *Nat. Methods* 6, 343–345.
  41. Morito, D., Nishikawa, K., Hoseki, J., Kitamura, A., Kotani, Y., Kiso, K., Kinjo, M., Fujiyoshi, Y., and Nagata, K. (2014).

- Moyamoya disease-associated protein mysterin/RNF213 is a novel AAA+ ATPase, which dynamically changes its oligomeric state. *Sci. Rep.* 4, 4442.
42. Farlow, J.L., Lin, H., Sauerbeck, L., Lai, D., Koller, D.L., Pugh, E., Hetrick, K., Ling, H., Kleinloog, R., van der Vlies, P., et al.; FIA Study Investigators (2015). Lessons learned from whole exome sequencing in multiplex families affected by a complex genetic disorder, intracranial aneurysm. *PLoS ONE* 10, e0121104.
  43. Yan, J., Hitomi, T., Takenaka, K., Kato, M., Kobayashi, H., Okuda, H., Harada, K.H., and Koizumi, A. (2015). Genetic study of intracranial aneurysms. *Stroke* 46, 620–626.
  44. Lindner, C., Sigrüner, A., Walther, F., Bogdahn, U., Couraud, P.O., Schmitz, G., and Schlachetzki, F. (2012). ATP-binding cassette transporters in immortalised human brain microvascular endothelial cells in normal and hypoxic conditions. *Exp. Transl. Stroke Med.* 4, 9.
  45. Kamada, F., Aoki, Y., Narisawa, A., Abe, Y., Komatsuzaki, S., Kikuchi, A., Kanno, J., Niihori, T., Ono, M., Ishii, N., et al. (2011). A genome-wide association study identifies RNF213 as the first Moyamoya disease gene. *J. Hum. Genet.* 56, 34–40.
  46. Hervé, D., Philippi, A., Belbouab, R., Zerah, M., Chabrier, S., Collardeau-Frachon, S., Bergametti, F., Essongue, A., Berrou, E., Krivosic, V., et al. (2014). Loss of  $\alpha 1\beta 1$  soluble guanylate cyclase, the major nitric oxide receptor, leads to moyamoya and achalasia. *Am. J. Hum. Genet.* 94, 385–394.
  47. Shoemaker, L.D., Clark, M.J., Patwardhan, A., Chandratillake, G., Garcia, S., Chen, R., Morgan, A.A., Leng, N., Kirk, S., Chen, R., et al. (2015). Disease Variant Landscape of a Large Multiethnic Population of Moyamoya Patients by Exome Sequencing. *G3 (Bethesda)* 6, 41–49.
  48. Hitomi, T., Habu, T., Kobayashi, H., Okuda, H., Harada, K.H., Osafune, K., Taura, D., Sone, M., Asaka, I., Ameku, T., et al. (2013). Downregulation of Securin by the variant RNF213 R4810K (rs112735431, G>A) reduces angiogenic activity of induced pluripotent stem cell-derived vascular endothelial cells from moyamoya patients. *Biochem. Biophys. Res. Commun.* 438, 13–19.
  49. Kobayashi, H., Matsuda, Y., Hitomi, T., Okuda, H., Shioi, H., Matsuda, T., Imai, H., Sone, M., Taura, D., Harada, K.H., et al. (2015). Biochemical and Functional Characterization of RNF213 (Mysterin) R4810K, a Susceptibility Mutation of Moyamoya Disease, in Angiogenesis In Vitro and In Vivo. *J. Am. Heart Assoc.* 4, 4.
  50. Hitomi, T., Habu, T., Kobayashi, H., Okuda, H., Harada, K.H., Osafune, K., Taura, D., Sone, M., Asaka, I., Ameku, T., et al. (2013). The moyamoya disease susceptibility variant RNF213 R4810K (rs112735431) induces genomic instability by mitotic abnormality. *Biochem. Biophys. Res. Commun.* 439, 419–426.
  51. Sonobe, S., Fujimura, M., Niizuma, K., Nishijima, Y., Ito, A., Shimizu, H., Kikuchi, A., Arai-Ichinoi, N., Kure, S., and Tominaga, T. (2014). Temporal profile of the vascular anatomy evaluated by 9.4-T magnetic resonance angiography and histopathological analysis in mice lacking RNF213: a susceptibility gene for moyamoya disease. *Brain Res.* 1552, 64–71.
  52. Sonobe, S., Fujimura, M., Niizuma, K., Fujimura, T., Furudate, S., Nishijima, Y., Kure, S., and Tominaga, T. (2014). Increased vascular MMP-9 in mice lacking RNF213: moyamoya disease susceptibility gene. *Neuroreport* 25, 1442–1446.
  53. Ito, A., Fujimura, M., Niizuma, K., Kanoke, A., Sakata, H., Morita-Fujimura, Y., Kikuchi, A., Kure, S., and Tominaga, T. (2015). Enhanced post-ischemic angiogenesis in mice lacking RNF213; a susceptibility gene for moyamoya disease. *Brain Res.* 1594, 310–320.
  54. Ohkubo, K., Sakai, Y., Inoue, H., Akamine, S., Ishizaki, Y., Matsushita, Y., Sanefuji, M., Torisu, H., Ihara, K., Sardiello, M., and Hara, T. (2015). Moyamoya disease susceptibility gene RNF213 links inflammatory and angiogenic signals in endothelial cells. *Sci. Rep.* 5, 13191.
  55. Fukushima, Y., Miyawaki, S., Inoue, T., Shimizu, S., Yoshikawa, G., Imai, H., Saito, N., and Tsutsumi, K. (2015). Repeated de novo aneurysm formation after anastomotic surgery: Potential risk of genetic variant RNF213 c.14576G>A. *Surg. Neurol. Int.* 6, 41.
  56. Cecchi, A.C., Guo, D., Ren, Z., Flynn, K., Santos-Cortez, R.L., Leal, S.M., Wang, G.T., Regalado, E.S., Steinberg, G.K., Shendure, J., et al.; University of Washington Center for Mendelian Genomics (2014). RNF213 rare variants in an ethnically diverse population with Moyamoya disease. *Stroke* 45, 3200–3207.
  57. Kiando, S.R., Barlassina, C., Cusi, D., Galan, P., Lathrop, M., Plouin, P.F., Jeunemaitre, X., and Bouatia-Naji, N. (2015). Exome sequencing in seven families and gene-based association studies indicate genetic heterogeneity and suggest possible candidates for fibromuscular dysplasia. *J. Hypertens.* 33, 1802–1810, discussion 1810.
  58. Koizumi, A., Kobayashi, H., Liu, W., Fujii, Y., Senevirathna, S.T., Nanayakkara, S., Okuda, H., Hitomi, T., Harada, K.H., Takenaka, K., et al. (2013). P.R4810K, a polymorphism of RNF213, the susceptibility gene for moyamoya disease, is associated with blood pressure. *Environ. Health Prev. Med.* 18, 121–129.
  59. Miyawaki, S., Imai, H., Shimizu, M., Yagi, S., Ono, H., Mukasa, A., Nakatomi, H., Shimizu, T., and Saito, N. (2013). Genetic variant RNF213 c.14576G>A in various phenotypes of intracranial major artery stenosis/occlusion. *Stroke* 44, 2894–2897.
  60. Miyawaki, S., Imai, H., Takayanagi, S., Mukasa, A., Nakatomi, H., and Saito, N. (2012). Identification of a genetic variant common to moyamoya disease and intracranial major artery stenosis/occlusion. *Stroke* 43, 3371–3374.
  61. Smith, K.R., Leventer, R.J., Mackay, M.T., Pope, K., Gillies, G., Delatycki, M.B., Amor, D.J., Bahlo, M., and Lockhart, P.J. (2014). Identification of a novel RNF213 variant in a family with heterogeneous intracerebral vasculopathy. *Int. J. Stroke* 9, E26–E27.
  62. Bang, O.Y., Ryoo, S., Kim, S.J., Yoon, C.H., Cha, J., Yeon, J.Y., Kim, K.H., Kim, G.M., Chung, C.S., Lee, K.H., et al. (2015). Adult Moyamoya Disease: A Burden of Intracranial Stenosis in East Asians? *PLoS ONE* 10, e0130663.
  63. Wu, Z., Jiang, H., Zhang, L., Xu, X., Zhang, X., Kang, Z., Song, D., Zhang, J., Guan, M., and Gu, Y. (2012). Molecular analysis of RNF213 gene for moyamoya disease in the Chinese Han population. *PLoS ONE* 7, e48179.
  64. Moteki, Y., Onda, H., Kasuya, H., Yoneyama, T., Okada, Y., Hirota, K., Mukawa, M., Nariai, T., Mitani, S., and Akagawa, H. (2015). Systematic Validation of RNF213 Coding Variants in Japanese Patients With Moyamoya Disease. *J. Am. Heart Assoc.* 4, 4.
  65. Lee, M.J., Chen, Y.F., Fan, P.C., Wang, K.C., Wang, K., Wang, J., and Kuo, M.F. (2015). Mutation genotypes of RNF213 gene from moyamoya patients in Taiwan. *J. Neurol. Sci.* 353, 161–165.
  66. Koizumi, A., Kobayashi, H., Hitomi, T., Harada, K.H., Habu, T., and Youssefian, S. (2016). A new horizon of moyamoya

- disease and associated health risks explored through RNF213. *Environ. Health Prev. Med.* 21, 55–70.
67. Scott, R.M., and Smith, E.R. (2009). Moyamoya disease and moyamoya syndrome. *N. Engl. J. Med.* 360, 1226–1237.
68. Kessler, K., Borges, L.F., Ho-Tin-Noé, B., Jondeau, G., Michel, J.B., and Vranckx, R. (2014). Angiogenesis and remodelling in human thoracic aortic aneurysms. *Cardiovasc. Res.* 104, 147–159.
69. Hoh, B.L., Hosaka, K., Downes, D.P., Nowicki, K.W., Wilmer, E.N., Velat, G.J., and Scott, E.W. (2014). Stromal cell-derived factor-1 promoted angiogenesis and inflammatory cell infiltration in aneurysm walls. *J. Neurosurg.* 120, 73–86.
70. Li, B., Li, F., Chi, L., Zhang, L., and Zhu, S. (2013). The expression of SPARC in human intracranial aneurysms and its relationship with MMP-2/-9. *PLoS ONE* 8, e58490.
71. Imai, Y., Sato, K., Ishikawa, T., Comerford, A., David, T., and Yamaguchi, T. (2010). ATP transport in saccular cerebral aneurysms at arterial bends. *Ann. Biomed. Eng.* 38, 927–934.
72. Power, A.S., Pham, T., Loisel, D.S., Crossman, D.H., Ward, M.L., and Hickey, A.J. (2016). Impaired ADP channeling to mitochondria and elevated reactive oxygen species in hypertensive hearts. *Am. J. Physiol. Heart Circ. Physiol.* 310, H1649–H1657.
73. Vanhoutte, P.M., Zhao, Y., Xu, A., and Leung, S.W. (2016). Thirty Years of Saying NO: Sources, Fate, Actions, and Misfortunes of the Endothelium-Derived Vasodilator Mediator. *Circ. Res.* 119, 375–396.
74. van 't Hof, F.N., Kurki, M.I., Kleinloog, R., de Bakker, P.I., von und zu Fraunberg, M., Jääskeläinen, J.E., Gaál, E.I., Lehto, H., Kivisaari, R., Laakso, A., et al. (2014). Genetic risk load according to the site of intracranial aneurysms. *Neurology* 83, 34–39.
75. Kurki, M.I., Gaál, E.I., Kettunen, J., Lappalainen, T., Menelaou, A., Anttila, V., van 't Hof, F.N., von Und Zu Fraunberg, M., Helttunen, S., Hiltunen, M., et al. (2014). High risk population isolate reveals low frequency variants predisposing to intracranial aneurysms. *PLoS Genet.* 10, e1004134.

**The American Journal of Human Genetics, Volume 99**

**Supplemental Data**

***RNF213* Is Associated with Intracranial Aneurysms  
in the French-Canadian Population**

**Sirui Zhou, Amirthagowri Ambalavanan, Daniel Rochefort, Pingxing Xie, Cynthia V. Bourassa, Pascale Hince, Alexandre Dionne-Laporte, Dan Spiegelman, Ziv Gan-Or, Cathy Mirarchi, Vessela Zaharieva, Nicolas Dupré, Hatasu Kobayashi, Toshiaki Hitomi, Kouji Harada, Akio Koizumi, Lan Xiong, Patrick A. Dion, and Guy A. Rouleau**

**Figure S1: PCA analysis of FC patients and controls**

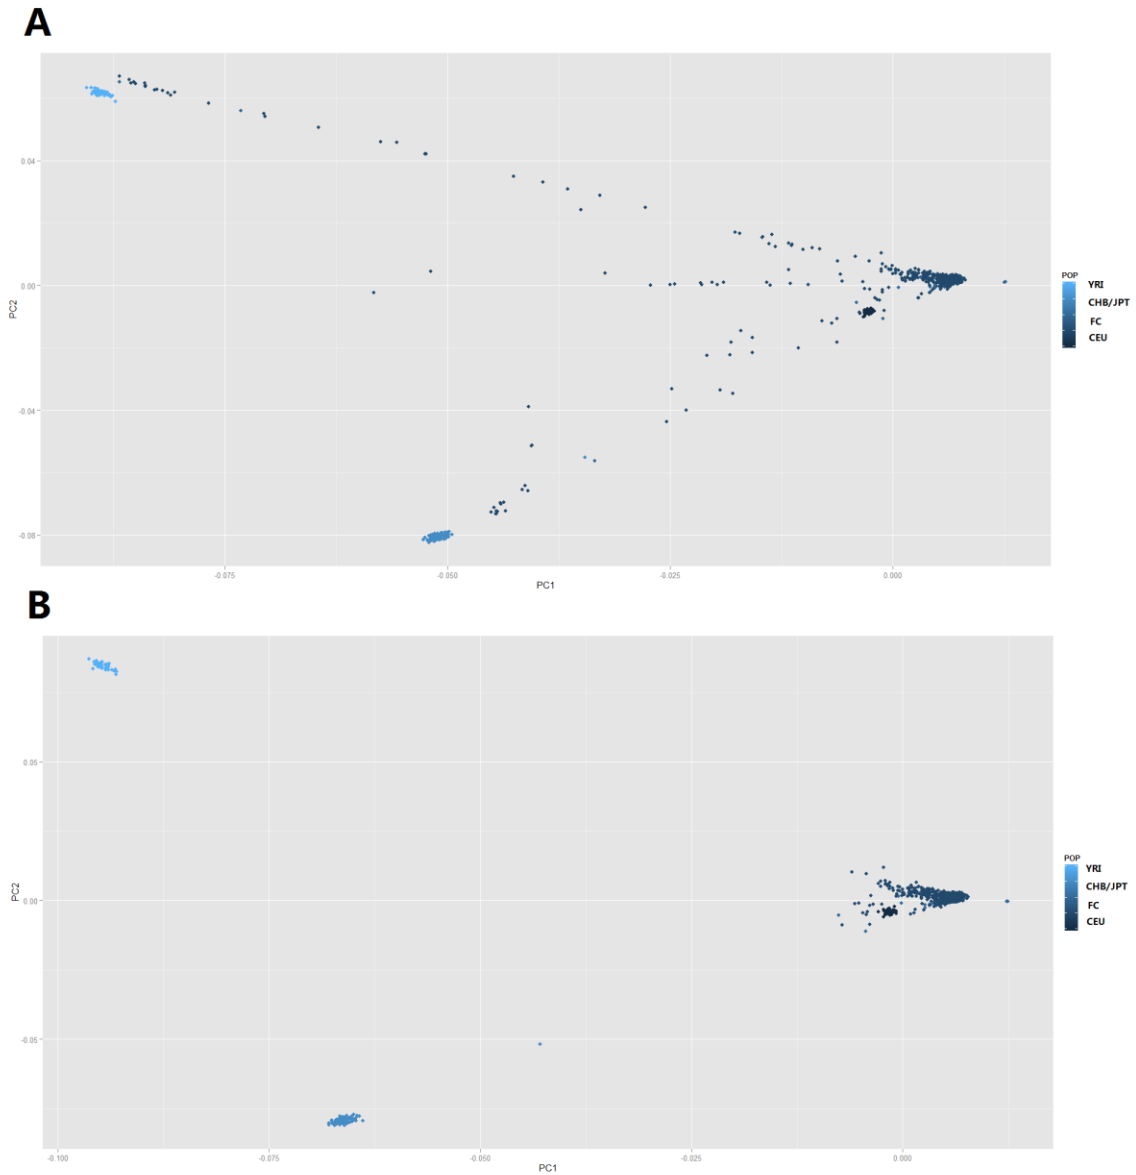

PCA analysis done using smartPCA and graph constructed by R. (A) PCA plot of the FC NeuroX cohort (B) Samples involved in this study after the removal of 95 admixed individuals. YRI, CHB/JPT and CEU



populations from 1KG phase III were used for clustering and outliers with less than 90% of European ancestry are removed.

Figure S2:  $F_{ST}$  of *RNF213* common variations between worldwide populations

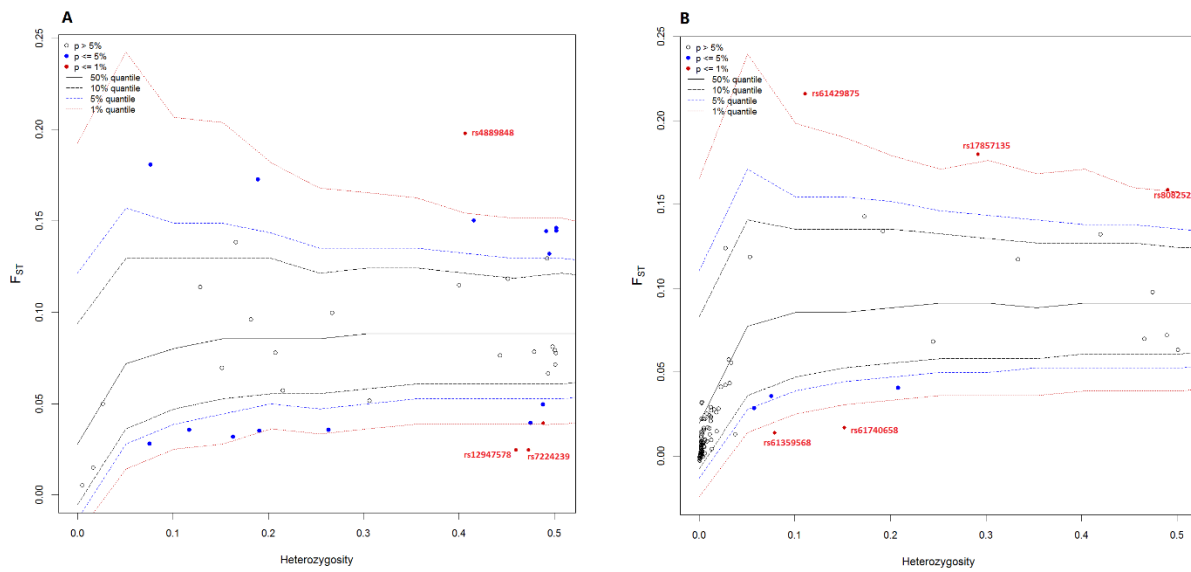

$F_{ST}$  of *RNF213* common variants (A) and (B) functional variants, SNPs in red indicate they are outliers of 50% quantile.

Figure S3: MAF of rs6565666 distribution in world-wide populations

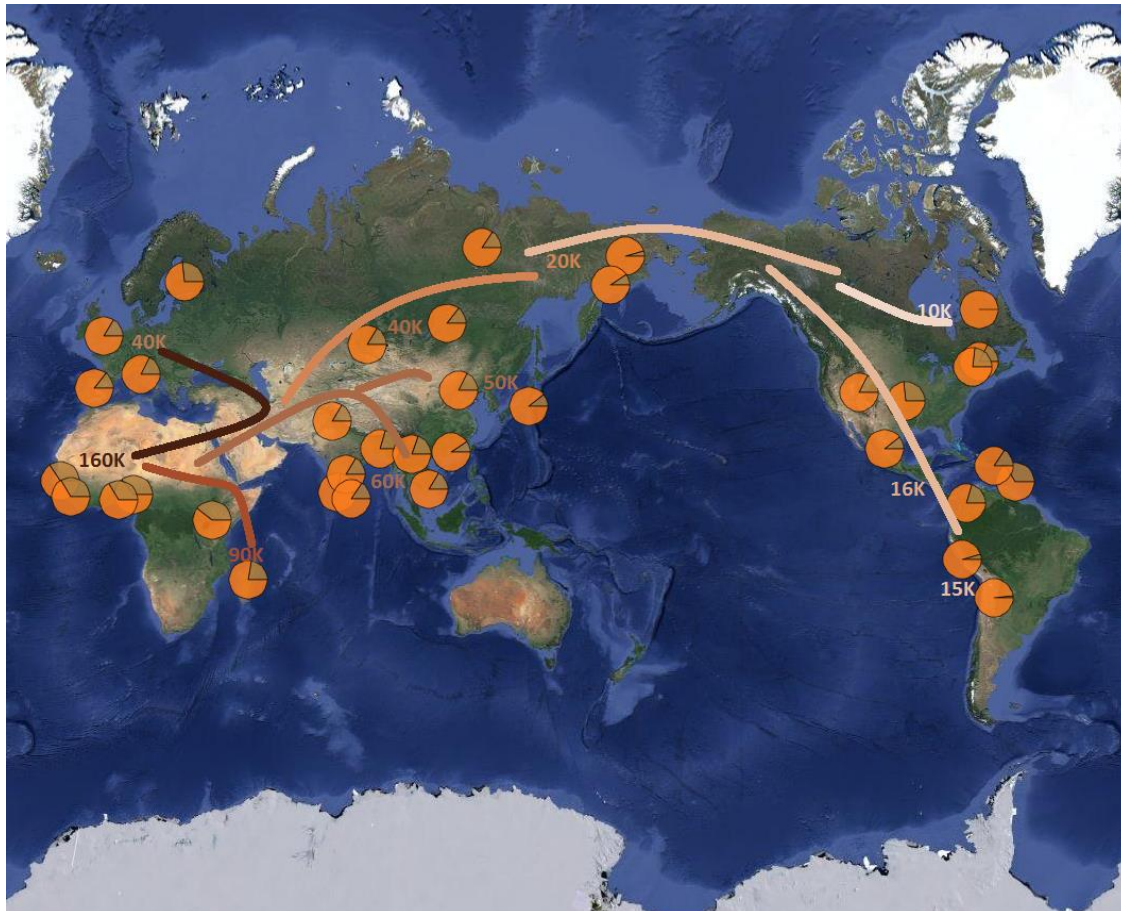

The frequency of rs6565666 non-ancestral allele decreased from Africans (0.26-0.35) to Europeans (0.16-0.18) and Asians (0.17-0.1) to the lowest in arctic populations (0.04-0.003). This non-ancestral allele seem also to be the risk allele for IA (dominant model for minor allele,  $p=0.0001739$ ), which seems to correlate with the Out-of-Africa migration patterns and risk allele being purged in the evolution.

**Table S1. Clinical descriptions of the IA discovery cohort and replication cohort.**

|                                                | Number of individuals in discovery cohort | Number of individuals in replication cohort (familial) | Number of individuals in replication cohort (sporadic) |
|------------------------------------------------|-------------------------------------------|--------------------------------------------------------|--------------------------------------------------------|
| With clinical file                             | 26                                        | 147                                                    | 65                                                     |
| Multiple aneurysms                             | 12                                        | 55                                                     | 19                                                     |
| SAH                                            | 5                                         | 51                                                     | 25                                                     |
| Hypertension                                   | 4                                         | 60                                                     | 31                                                     |
| Drinking                                       | 12                                        | 33                                                     | 26                                                     |
| Smoking                                        | 24                                        | 89                                                     | 50                                                     |
| Hypercholesterolemia                           | 3                                         | 29                                                     | 24                                                     |
| Hypothyroidism                                 | 0                                         | 17                                                     | 14                                                     |
| Had heart diseases and other vascular diseases | 0                                         | 13                                                     | 3                                                      |

**Table S3: Population data retrieved for this study**

| Region         | Populations    | No. Samples | Data access       | Data source  | SNPs in RNF213 |
|----------------|----------------|-------------|-------------------|--------------|----------------|
| Argentina      | Argentina      | 50          | GEO               | Omni         | 40             |
| Siberia        | Chukotka       | 48          | GEO               | Omni         | 48             |
| Siberia        | East-Siberia   | 85          | GEO               | Omni         | 48             |
| Kamchatka Krai | Kamchatka Krai | 67          | GEO               | Omni         | 48             |
| Sakha Republic | Sakha Republic | 46          | GEO               | Omni         | 48             |
| West-Siberia   | West-Siberia   | 103         | GEO               | Omni         | 48             |
| Africa         | Madagascar     | 69          | GEO               | Omni         | 39             |
| East_Asia      | Han Chinese    | 203         | 1000 Genome       | Omni & Exome | 1835           |
| East_Asia      | JPT            | 104         | 1000 Genome       | Omni & Exome | 1835           |
| East_Asia      | CDX            | 93          | 1000 Genome       | Omni & Exome | 1835           |
| East_Asia      | Vietnamese     | 117         | 1000 Genome & GEO | Omni & Exome | 1835           |
| Europe         | CEU            | 99          | 1000 Genome       | Omni & Exome | 1835           |

|                |       |     |                |              |      |
|----------------|-------|-----|----------------|--------------|------|
| Europe         | TSI   | 107 | 1000 Genome    | Omni & Exome | 1835 |
| Europe         | GBR   | 91  | 1000 Genome    | Omni & Exome | 1835 |
| Europe         | FIN   | 99  | 1000 Genome    | Omni & Exome | 1835 |
| Europe         | IBS   | 107 | 1000 Genome    | Omni & Exome | 1835 |
| Africa         | YRI   | 108 | 1000 Genome    | Omni & Exome | 1835 |
| Africa         | LWK   | 99  | 1000 Genome    | Omni & Exome | 1835 |
| Africa         | GWD   | 113 | 1000 Genome    | Omni & Exome | 1835 |
| Africa         | MSL   | 85  | 1000 Genome    | Omni & Exome | 1835 |
| Africa         | ESN   | 99  | 1000 Genome    | Omni & Exome | 1835 |
| Native-America | ASW   | 61  | 1000 Genome    | Omni & Exome | 1835 |
| Native-America | ACB   | 96  | 1000 Genome    | Omni & Exome | 1835 |
| Native-America | MXL   | 64  | 1000 Genome    | Omni & Exome | 1835 |
| Native-America | PUR   | 104 | 1000 Genome    | Omni & Exome | 1835 |
| Native-America | CLM   | 94  | 1000 Genome    | Omni & Exome | 1835 |
| Native-America | PEL   | 85  | 1000 Genome    | Omni & Exome | 1835 |
| South_Asia     | GIH   | 103 | 1000 Genome    | Omni & Exome | 1835 |
| South_Asia     | PJL   | 96  | 1000 Genome    | Omni & Exome | 1835 |
| South_Asia     | BEB   | 86  | 1000 Genome    | Omni & Exome | 1835 |
| South_Asia     | STU   | 102 | 1000 Genome    | Omni & Exome | 1835 |
| South_Asia     | ITU   | 102 | 1000 Genome    | Omni & Exome | 1835 |
| Inuit          | Inuit | 185 | In house & GEO | Omni         | 39   |

**Table S4: Exome sequencing coverage of 26 IA patients from the initial cohort**

| Indiv | Raw reads | % Coverage (10X) | 20X  | 30X  | 50X  | 75X  | 100X | Average base depth |
|-------|-----------|------------------|------|------|------|------|------|--------------------|
| 09-1  | 7.90E+07  | 97.1             | 90.7 | 81.2 | 59.8 | 35.5 | 18.5 | 66.07              |
| 09-2  | 8.80E+07  | 97.8             | 93.6 | 86.5 | 68.4 | 46.1 | 28.1 | 78.44              |
| 28-1  | 1.40E+08  | 98.4             | 97   | 94.7 | 87.5 | 75.8 | 63.4 | 144.4              |

|      |          |      |      |      |      |      |      |        |
|------|----------|------|------|------|------|------|------|--------|
| 28-2 | 1.40E+08 | 98.7 | 97.1 | 94.3 | 85.8 | 72.8 | 59.5 | 133.63 |
| 28-3 | 1.04E+08 | 98.2 | 95.6 | 90.9 | 77.7 | 59.5 | 42.6 | 99.55  |
| 28-4 | 9.10E+07 | 98.2 | 95   | 89.5 | 75   | 55.8 | 38.7 | 93.58  |
| 94-1 | 1.10E+08 | 98.5 | 96.7 | 93.3 | 82.4 | 65.7 | 49.7 | 111.25 |
| 94-2 | 1.10E+08 | 98.3 | 95.7 | 91.2 | 79.6 | 63.3 | 47.4 | 108.05 |
| 94-3 | 1.30E+08 | 98.8 | 97.3 | 94.9 | 87   | 74.3 | 61   | 137.29 |
| 94-4 | 1.10E+08 | 98.5 | 96.7 | 93.4 | 82.5 | 65.9 | 50   | 112.03 |
| 60-1 | 2.60E+09 | 90.9 | 85.5 | 79.3 | 62.6 | 40.9 | 25.8 | 78.36  |
| 60-2 | 3.10E+09 | 91.9 | 87.4 | 82.6 | 69.2 | 49.6 | 33.7 | 92.27  |
| 60-3 | 2.70E+09 | 91.5 | 86.6 | 80.9 | 64.9 | 43.2 | 27.7 | 81.79  |
| 60-4 | 3.40E+09 | 91.8 | 87.6 | 83.3 | 72.6 | 55.5 | 39.6 | 102.47 |
| 60-5 | 2.70E+09 | 90.6 | 85.3 | 79.2 | 63.4 | 42.5 | 27.4 | 80.68  |
| 10-1 | 3.10E+09 | 91.5 | 86.8 | 81.9 | 68.9 | 49.4 | 33.4 | 91.2   |
| 10-2 | 3.20E+09 | 91.7 | 87.2 | 82.7 | 70.9 | 52.8 | 36.7 | 97     |
| 10-3 | 3.80E+09 | 92.8 | 89.1 | 85.3 | 75.5 | 59.7 | 44.5 | 113.59 |
| 10-4 | 3.60E+09 | 92.5 | 87   | 81.2 | 69.4 | 54.7 | 41.3 | 108.23 |
| 10-5 | 3.10E+10 | 91.4 | 86.9 | 82   | 68.8 | 49.1 | 33.2 | 91.07  |
| 89-1 | 6.00E+09 | 93.6 | 90.6 | 88   | 83.2 | 75.9 | 67.1 | 177.72 |
| 89-2 | 1.20E+09 | 82.6 | 65.5 | 47   | 22.3 | 9.5  | 4.5  | 35.36  |
| 89-3 | 2.60E+09 | 90.2 | 84.2 | 77.7 | 61   | 39.7 | 25.1 | 76.43  |
| 89-4 | 2.60E+09 | 90.2 | 84.4 | 78   | 61.9 | 41.1 | 26.2 | 78.39  |
| 89-5 | 3.40E+09 | 91.5 | 87.1 | 82.7 | 71.7 | 55   | 39.6 | 102.88 |
| 89-6 | 4.20E+09 | 93   | 89.3 | 86.1 | 78.6 | 66   | 51.7 | 126.19 |

**Table S6. Cochran-Armitage trend test on 38 polymorphic SNPs in *RNF213* loci**

| CHR | SNP | A1 | A2 | TEST | AFF | UNAFF | CHISQ | DF | P |
|-----|-----|----|----|------|-----|-------|-------|----|---|
|-----|-----|----|----|------|-----|-------|-------|----|---|

|    |                       |   |   |       |         |           |          |   |          |
|----|-----------------------|---|---|-------|---------|-----------|----------|---|----------|
| 17 | rs7217421             | A | G | TREND | 248/256 | 1722/1996 | 1.478    | 1 | 0.2241   |
| 17 | rs4889968             | G | A | TREND | 12/484  | 117/3513  | 0.8884   | 1 | 0.3459   |
| 17 | rs9916351             | C | T | TREND | 221/287 | 1757/1969 | 2.436    | 1 | 0.1186   |
| 17 | rs12947578            | A | G | TREND | 202/306 | 1583/2139 | 1.444    | 1 | 0.2295   |
| 17 | rs9913317             | A | G | TREND | 0/502   | 1/3733    | 0.1345   | 1 | 0.7138   |
| 17 | rs7219131             | C | T | TREND | 224/280 | 1780/1940 | 2.13     | 1 | 0.1444   |
| 17 | rs12601730            | G | T | TREND | 12/496  | 113/3615  | 0.6745   | 1 | 0.4115   |
| 17 | rs7220465             | T | C | TREND | 128/374 | 1092/2636 | 3.117    | 1 | 0.0775   |
| 17 | rs11869363            | C | T | TREND | 136/370 | 1173/2545 | 4.732    | 1 | 0.0296   |
| 17 | rs12937242            | T | C | TREND | 77/431  | 687/3037  | 3.324    | 1 | 0.06827  |
| 17 | rs8068939             | T | G | TREND | 125/383 | 1004/2728 | 1.193    | 1 | 0.2747   |
| 17 | rs12451223            | C | T | TREND | 120/388 | 935/2795  | 0.501    | 1 | 0.4791   |
| 17 | rs8081176             | C | T | TREND | 159/349 | 1265/2467 | 1.327    | 1 | 0.2494   |
| 17 | rs6565666             | A | G | TREND | 119/389 | 649/3085  | 11.29    | 1 | 0.00078  |
| 17 | rs7225029             | A | G | TREND | 45/461  | 280/3450  | 1.255    | 1 | 0.2626   |
| 17 | rs4889843             | G | A | TREND | 246/262 | 1681/2045 | 1.996    | 1 | 0.1577   |
| 17 | rs9907978             | A | G | TREND | 146/362 | 1243/2487 | 4.172    | 1 | 0.0411   |
| 17 | rs9908583             | G | A | TREND | 143/359 | 1232/2456 | 4.754    | 1 | 0.02923  |
| 17 | rs4890008             | T | G | TREND | 27/481  | 151/3577  | 1.791    | 1 | 0.1807   |
| 17 | rs10782008            | G | A | TREND | 173/335 | 1393/2331 | 2.139    | 1 | 0.1436   |
| 17 | rs8072917             | C | T | TREND | 173/335 | 1393/2331 | 2.148    | 1 | 0.1428   |
| 17 | rs4890009             | G | A | TREND | 144/358 | 1242/2484 | 4.266    | 1 | 0.03889  |
| 17 | rs4890010             | C | T | TREND | 173/335 | 1393/2327 | 2.209    | 1 | 0.1372   |
| 17 | NeuroX_chr17:78319717 | T | C | TREND | 0/508   | 2/3732    | 0.2724   | 1 | 0.6018   |
| 17 | rs11150856            | C | T | TREND | 68/440  | 544/3188  | 0.4948   | 1 | 0.4818   |
| 17 | rs12051723            | T | G | TREND | 98/410  | 545/3183  | 7.603    | 1 | 0.005829 |
| 17 | rs11655038            | T | G | TREND | 40/468  | 337/3391  | 0.7355   | 1 | 0.3911   |
| 17 | rs7216493             | G | A | TREND | 128/380 | 1086/2642 | 3.345    | 1 | 0.0674   |
| 17 | rs8078251             | G | A | TREND | 170/338 | 1230/2490 | 0.03161  | 1 | 0.8589   |
| 17 | rs4078429             | G | A | TREND | 28/478  | 198/3532  | 0.04479  | 1 | 0.8324   |
| 17 | rs6565681             | A | G | TREND | 76/430  | 610/3114  | 0.5957   | 1 | 0.4402   |
| 17 | rs4889848             | C | T | TREND | 75/433  | 608/3124  | 0.7565   | 1 | 0.3844   |
| 17 | rs7224239             | G | A | TREND | 249/259 | 1622/2112 | 5.759    | 1 | 0.01641  |
| 17 | rs12944385            | G | A | TREND | 3/505   | 22/3712   | 1.44E-05 | 1 | 0.997    |
| 17 | rs4890018             | C | T | TREND | 31/477  | 210/3516  | 0.1718   | 1 | 0.6785   |
| 17 | rs8072774             | T | C | TREND | 40/466  | 324/3406  | 0.3454   | 1 | 0.5567   |
| 17 | rs3185057             | A | G | TREND | 51/457  | 312/3418  | 1.541    | 1 | 0.2144   |
| 17 | rs8359                | T | C | TREND | 42/466  | 332/3400  | 0.2201   | 1 | 0.6389   |
